# Supplementary material for: Enigmatic Evolutionary History of Porphobilinogen Deaminase in Eukaryotic Phototrophs
Source: MDPI journal article supplement (doi:10.3390/biology10050386), 2021-04-29
Supplement: s1 [file s1]

## **Supplementary material**

**Supplementary figure S1:** Bayesian phylogenetic tree as inferred from amino acid sequences of PBGD. Numbers above branches indicate Bayesian posterior probabilities.

**Supplementary figure S2:** Maximum likelihood phylogenetic tree as inferred from amino acid sequences of PBGD. Numbers above branches indicate ML bootstrap support.

**Dataset S1:** Multiple alignment (fasta) of PBGD amino acid sequences used for the construction of phylogenetic trees.

Supplementary Figure 1:

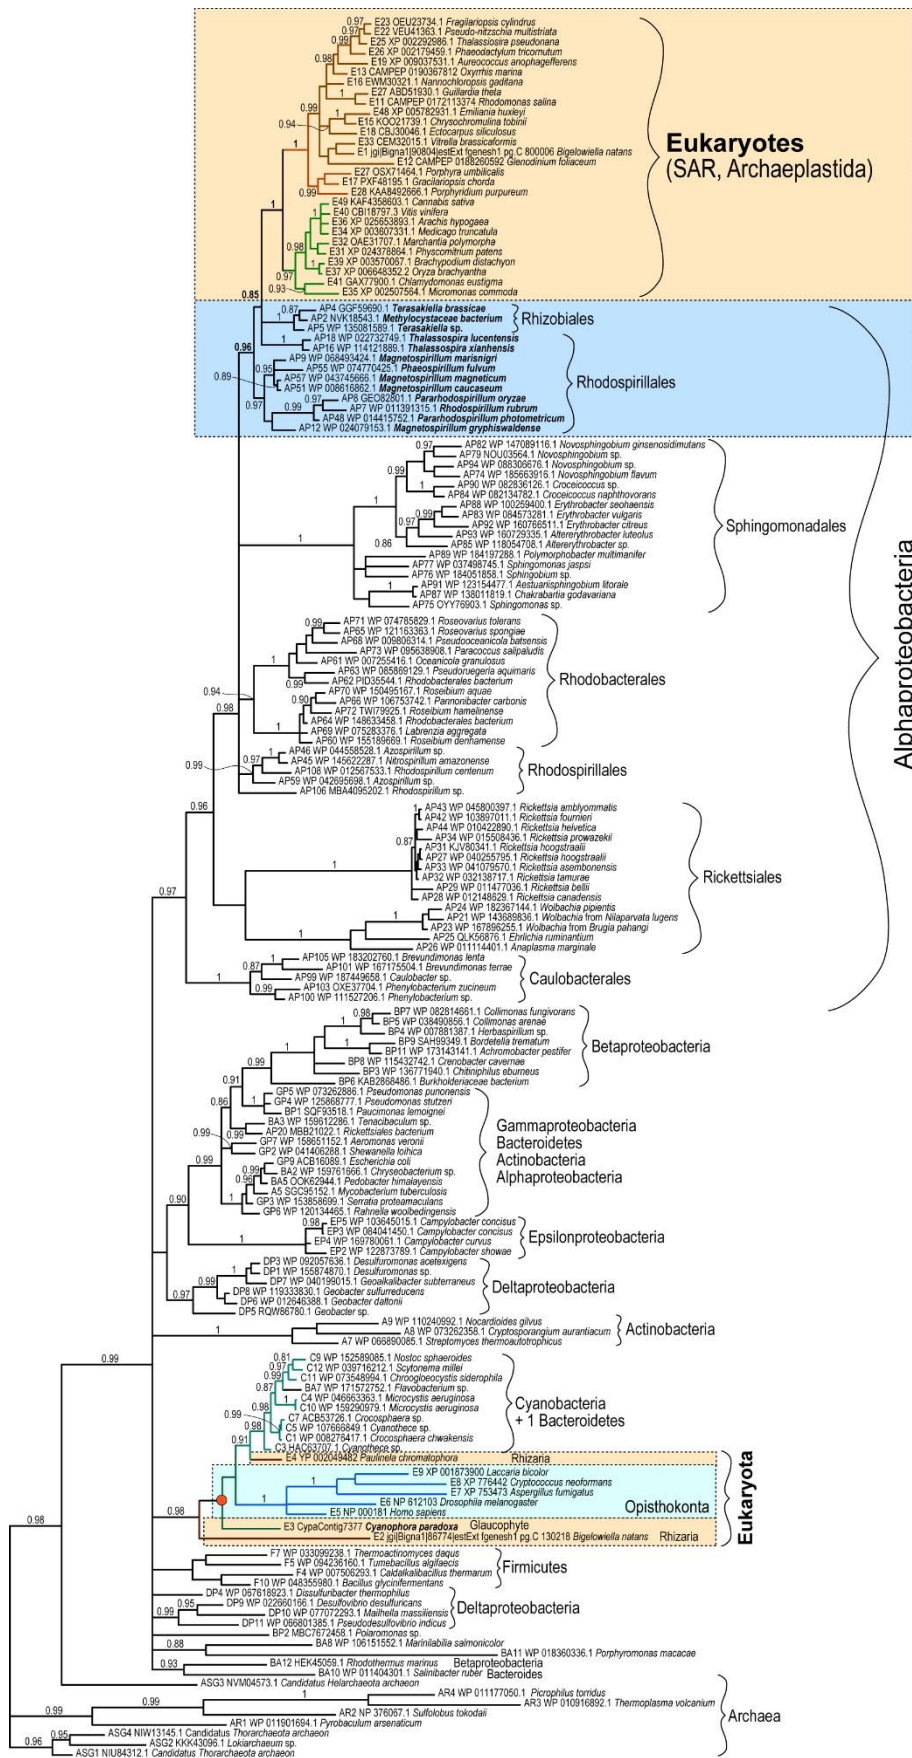

Supplementary figure 2:

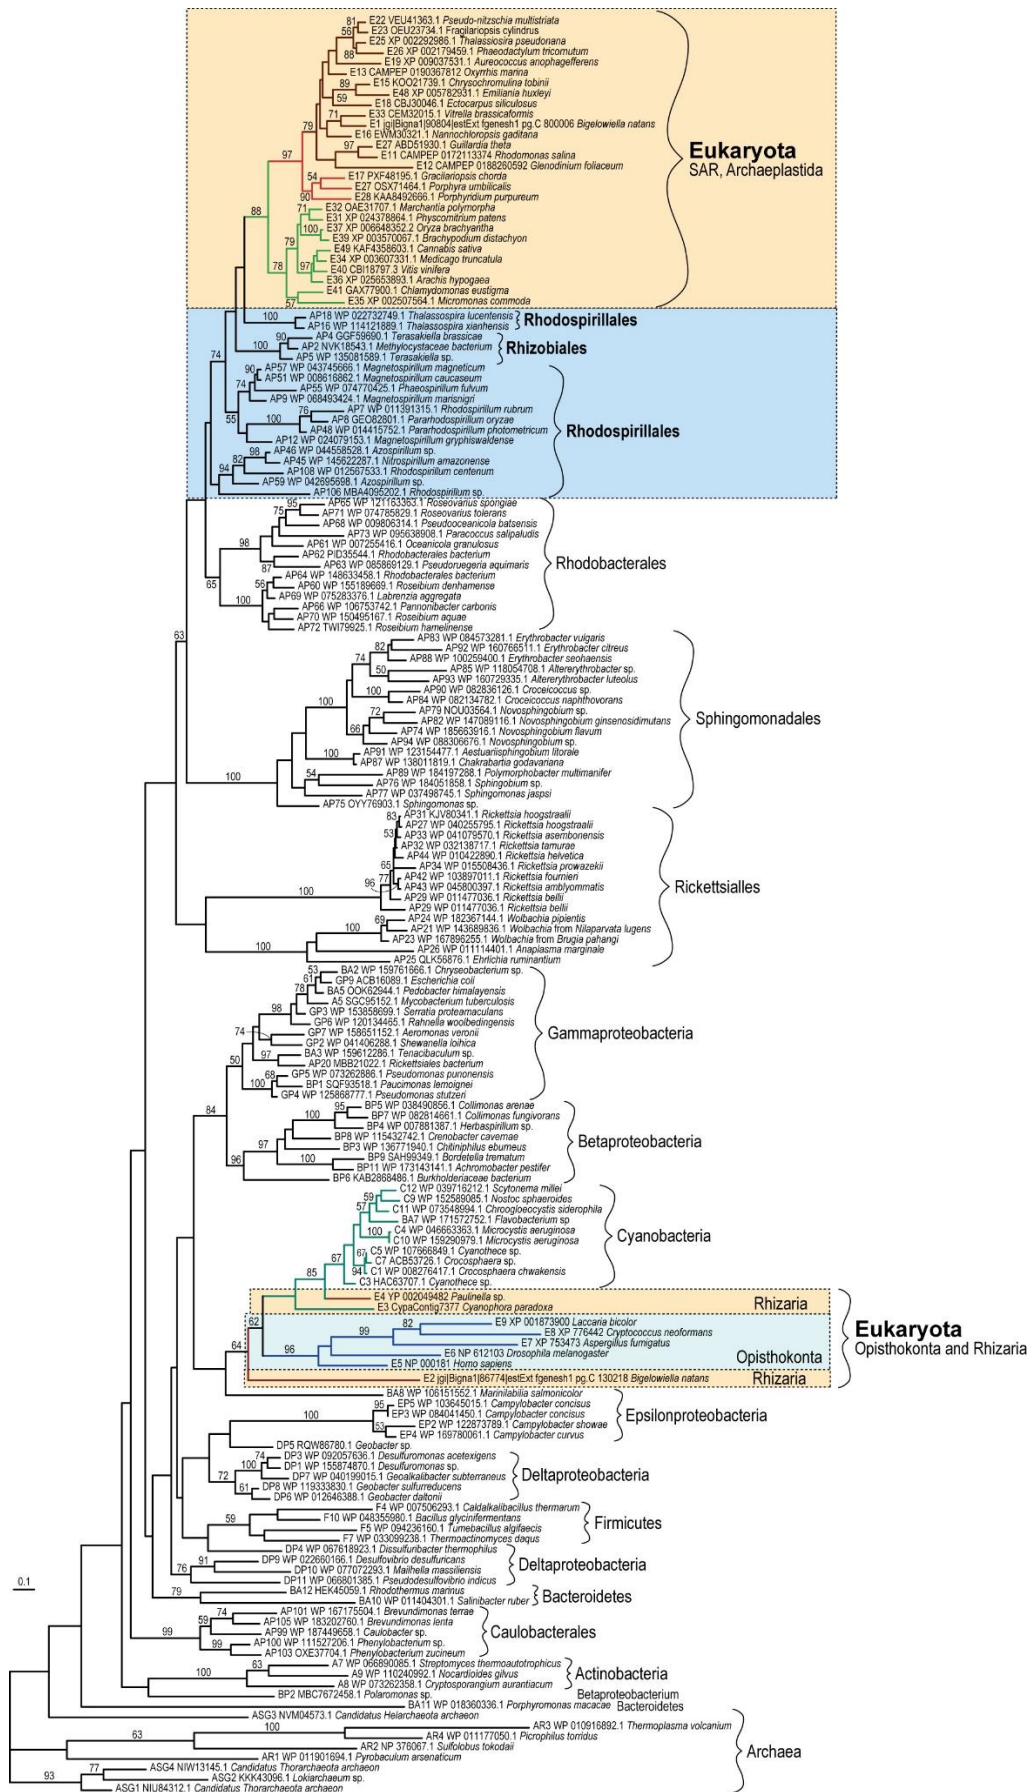

## Supplementary file 1:

>AR1\_WP\_011901694.1\_Pyrobaculum\_arsenaticum  
VVATRGSKLSMLQTEELLAQIEIKIVKTGDEVQDKPLYVKGIFEKEVNLAVLRGEADVAVHSLKDLPSSELSPLGLVLAGFSKRAPPFDVAVSVL  
ETLPRGALVGTSSVRRAEFVKAIRPDVRGNVDTRINKIDAAIMAVAGIYRLPPPGQGIVAAVVRREADASDPKASLEAIAEREFKLAVGAGCHVA  
IGGVAVEFIAPVEVGRRAAEEI  
>AR2\_NP\_376067.1\_Sulfolobus\_tokodaii  
RIAARGSKLSRIQVMMVENYLEFIEIKTKADLQNEPLS-  
KGVFEKEVNVQAVLDNKADVAVHSMKDIILTEISENLEIYAVLPRDPPFDILISNLFNLEPNSIIIGTSSIRRNFLTFFYRNDLRGNIDTRLKKYDG  
IIIAEASIYRLPEANQGIIVVIGRKKDINDKDTLEIAIAERKALSIVGGGCHSPIGVYFKDFHGGELLGKRFLEEI  
>AR3\_WP\_010916892.1\_Thermoplasma\_volcanium  
KIGTRPSNLAVAQANMVASSLEIVKHSAGDIDTKNPIYKTGVFVQDLNNMILRGEIDVAVHSAKDIPSEIENRLTIAATLKRGSFNDALVSDL  
RSLPISAKVGTSSIRRIFFQLKYARQDLRGNIETRIAKMDAIVMAEAAIQRLPAPNQGIIVAVS-  
KKEINDENTFEEMQIERSVQQKLKGCSTPVGILSIIAQFVDSLVSIRENI  
>AR4\_WP\_011177050.1\_Picrophilus\_torridus  
RIGTRSSKLAMIQAMMVKDRLEVKGFTSKGDINLDSPLYGTGVFVDDLNRMILKNEIDIAVHSAKDIPSFIDDSLEISAVLKRDDPRDVLISL  
NDLEASSVIGTSSLRRIKELKTLRNDIRGNIDTRLKKLDGIIIMAKAAYDRMPAPNQGIIAIIS-  
KKDINDDETYNMKAEERLILSGLNLGCKSKPVGIYAFIMRFYNNIDLEFIRSE  
>ASG1\_NIU84312.1\_Candidatus\_Thorarchaeota\_archaeon  
TVGTRGSKLSLIQTENVIQKLEVQVIKTIGDEVTSKPLIEKGFKEIDKAVLRGDVDIAVHSMKDLPTIRPHKTIILAVPERESLYDALVSR  
KALPNKAIIGTGSPRRKAQVLMHRPDIRGNVDTRVRKLDAILAEAGLQRLPAPGQALAIVARQDDINHWPSMASVLAERSFIKEIGGGCRVP  
LGAFALSLHAPDELGLKVAQKI  
>ASG2\_KKK43096.1\_Lokiarchaeum\_sp  
IVGTRGSKLSLVQTDNVIQKLVNKI IKTYGDRKSHKPLIERGVFVKS LDKAVLEGKVDFAVHSMKDVPTKMLPKLKIVAVPKRGS AHDVLISK  
KELPKDAVIGTGSPRRMAQIYSIRSDLRGNVTRLKKFDGLVLAEIGLKRLPPPGQALAVIAREDNINHQSMSVILAERTFIGKLGGGCKLP  
LGAYALSLYAPENLGLKVAEEI  
>ASG3\_NVM04573.1\_Candidatus\_Helarchaeota\_archaeon  
IIGTRGSKLALIQAEVISELELR I KTHGDKFNKTPVHRKGVFVKEIDKALLEGVIDISVHSMKDLPTIPEGIFLGAIPKRKTYKDAIYSNL  
TDLKSGSIIGTGSPRRRSQVLYLRKDVGRGNIDTRIKKVDAILAKVGVQRLPAGQGALAVETRANNINDQKASLETLAEMAFINNMGGGQCIP  
IGVLGLHLKGYYKKMAEKLANKI  
>ASG4\_NIW13145.1\_Candidatus\_Thorarchaeota\_archaeon  
TAGTRGSNLSLAQTEVVVRKLVKVIKTGDRITHKPLEKGMFEKDIDKAVLRGDVDFAVHSMKDVPAIQFPKIMIVAVPERESPYDVLVSR  
KDLPNIAVIGTGSPRRKAQLHHVRPELRGNVDTRIRKLDAVIIAEAGLKRLPAPGQALAVA AKDNVNHWP SMAAVLA EKAFVRKIGGGCKVP  
LGAIALSLYTPEELGLKVAQEI  
>E1\_jgi|Bignal|90804|estExt\_fgenesht1\_pg.C\_800006  
RIGTRGSPLALAQAHETKRRLTINVISTEGDERLDIALAGKGLFTKELDVQLLNKVDICVHSMKDVPTYLPEGTILPCNLPRDTRDVFISL  
ADLPDGSVIGSASLRQSQILAKYPKLRGNVQTRLKKLDATMLALAGLKRMPIAIIAQGAIGIQCRNTDNLNHPETKTCTVDCERAFLAALDGNCRTP  
IAGQALHFRGAVAIKGEAGEYL  
>E2\_jgi|Bignal|86774|estExt\_fgenesht1\_pg.C\_130218  
RIGTRDSELAMWQAKHVESILKIVGMKTLGDKDLKSALSNKGVFTKELDAALLLGEVDIAVHSMKDLPTTLESGLSLGCVLERGTIEDAVVLSL  
ATLPAGSVLGTSALRRRAVLLRNFPDLRGNLQTRLRKLDAIILARTGLQRCHAVSQGALAVVCRE-----  
GCKVPIAVTSLRLKGSLELGLQMDKV  
>E3\_CypaContig7377  
RIGSRKSLAMWQSEWVKARLDIMAISTK-  
DKILDVPLADKGLFTKELEVELIANNVLDLVVHSLKDLQTNLPDEL DLGAVSDRHPDSDALVISIDDLPSGTIVGTSSLRRIAQLRHYRDDLRGN  
LQTRLKKLDIAVLATAGLERLHAGVQGALGVEIRKGDINHAPTRAKCEAERAFMRELEGCCQVP IGVFTLTLTGAEALGIELANIA  
>E4\_YP\_002049482\_Paulinela  
RIASRRSQLAMVQTHWVRDQLTITETMATQGDKIL DVALADKGLFTKELEAQMLVNRADIAVHSLKDLPTNLDPGLVLGCVTEREDPADALVILL  
DTLPNGSIVGTSSLRRLAQLRHHFPHLRGNVITRLEKLDCLILAAAGLQRLHAGVQGALGIECRDGDLEHAPTNYRCLAERAFLRELEGGCQVP  
IGVNTLILTGPEDIGIKLANIL  
>E5\_NP\_000181\_Homo\_sapiens  
RVGTRKSQLARIQTDSVATLEIIAMSTTGDKILD TALSEKS LFTKELEHALEKNEVDLVVHSLKDLPTVLP PGFTIGAICKRENPHDAVVFTL  
ETLPEKSVVGTSSLRRAQLRKFPHLRGNLNLRLRKL SAIILATAGLQRM YAVGQGALGVEVRAKDLHDPETTLRCLIAERAFLRHLEGGCSVP  
VAVHTLYLTGAQNLGISLANLL  
>E6\_NP\_612103\_Drosophila\_melanogaster  
RVGSRKSELALIQT KHVIGRLEIHTMSTFGDRVLNVSLPEKS LFTRDLEDALRNNGVDFVHSLKDLPTALPTGMAIGAVLEREDARDALVLT  
IASLPKGSVIGTSSLRRTAQIRRMYPHLRGNLNLRLAKLSGII LAQAGLV RMYAVGQGALAVECRANDLMCLNTTCRILAERSFLKTLGGGCSAP  
VAVWSLSLTGANQLGKTLAEDL  
>E7\_XP\_753473\_Aspergillus\_fumigatus  
TIGTRKSKLALLQTDLVVAALQIHSQETAGDKNTVIALRTKNLWTQELEELLMAGDVDLIVHSLKDVPTQLPPSCTLGPMMEREDTRDVLVMSF  
SEMPAGSVVGTSSIRRTAQLARYPHLRGNIGTRLAKLTCIVLAAAGLRLRYAVGQGALGVEIRKDDIGHQKTTLACLAERSLLRTLEGGCSAP  
LGVETLRMRAAEFEFGVTVAKAL  
>E8\_XP\_776442\_Cryptococcus\_neoformans  
ILGTRKSNLALVQTGHVADDLSIESMTTVGDRNQTTPLHAKSLWTDELEARLINGHFDMLVHSLKDVPTVLKDGCEIGCMAKRHDPRDALVVRL  
EDLPDGAVVGTGSVRRVAQLKRAFPNLRGNLNLTRFNKLSALILAMSGLERLHAGVQGALAIEIRSTDLGHWQTEWSCGAERGCLRVLEGGCSVP  
VGVESLWFSGAEQFGEECARRL  
>E9\_XP\_001873900\_Laccaria\_bicolor  
ILASRESQLAQIQTNSVLASFRAFMTTAGDKNQSQALYGKALWTKELEVALKEHHVDMVLVHSLKDVPTTLPDGCVLGGILEREDPVDSLIVVSL  
DELPSGSGVIGTSSVRRTAQLKRYPHLRGNLNLRLAKLSALILAKAGLVRLYAVSQGALGIEVRSDDLTHRETQLKCLAERACL RVLEGGCSVP  
VGVASLSLSGAEKVGTKLAKIL  
>E11\_CAMPEP\_0172113374\_Rhodomonas\_salina  
RLGTRGSPLALAQAYETRKRLQINIINTSGDMTLDKALSGKGLFTKELDVALLGNEVDFCVHSMKDVPTFLPDNTHLETMLPREDTRDAFISTV  
EELPEGTIIGSASLRRAQLLAKNP GIRGNVQTRLRKLDAITLLALAGLKRM PAVAQGAIGIQVRSDDLNDKDTKICVD CERSFLATLDGCKTP  
IAGQAIHFKGFMEIGRSAGEEI  
>E12\_CAMPEP\_0188260592\_Glenodinium\_foliaceum

RLGTRGSPLALAAQAYETKRRLEIKVISTTGDERLDVPLAGKGLFTRELDVALLNKEVDFCVHSTKDVPTALVPGTELCTMLPREDTRDVIISRF  
EDFPAGSVIGTASLRRQAQIYAKNPGVRGNVQTRLRKLDATLLAYAGLRMPAIAQGAISFQCTSDDLSHQPTFDAVTCERAFLASLDGNCKTP  
IAGQALRFQGAABIGRADAGGEL  
>E13\_CAMPEP\_0190367812\_Oxyrrhis\_marina  
RIGTRGSPLALAAQAYETKRRLEICVMKTQGDMILDKALSGKGLFTKELDVALLNNEVDICVHSMKDVPTWLPETITLPCNLPRDTRDAFICSV  
QELPDGSGVIGSASLRRQAQLLAMNPTLRGNVQTRLRKLDATLLALAGLRMPAQAQAIGIQCRENDLNHADTKTAVDCERAFLDLDGNCKTP  
IAGQALHFRG-----  
>E15\_KOO21739.1\_Chrysochromulina\_tobinii  
KVGTRGSPLALAAQAYETQRRLEICVIKTGDMVLDKALSGKGLFTKELDVSLNGAVDICVHSMKDVPTWLVDPGTVLPCNLPRDTRDAFISSL  
KSLKNGAVIGTASLRRQAQLLAMNPTLRGNVQTRLKKLDATLLAKAGLRMPAQAQAIGIQCRENDLNHQDTKVCVDCERAFLAALDGNCRTP  
IAGQALEFRGAVAIGEEAGKEL  
>E16\_EWM30321.1\_Nannochloropsis\_gaditana  
RIGTRGSPLALAAQAYETKRRLEIKI IKTGDMILDKALSGKGLFTKELDVALLGDEVVICVHSMKDVPTWLPDGTVLPCNLPRDSRDVFICSI  
AELPAGSVIGSASLRRQAQILARNPNVRGNVQTRLRKLDATMLAVAGLRMPAQAQAIGIQCRSDDLNPETKVCVDCERSFLAELDGNCKTP  
IAGQALHFKGAVKIGREAGEDL  
>E17\_PXF48195.1\_Gracilariopsis\_chorda  
VIGTRGSPLALAAQANETKRRLEIKI IHTGDMVLDKALAGKGLFTKEIDIAQLKGEIDIAVHSMKDVPTWLPDGIILPCMLPRDTRDVFISCI  
EDLPDGSVIGSASLRRQSQILAKNPTLRGNVQTRLRKLDATLLALAGLSRMPAQAQAIGITCREDDLNHKETKTCVGCERSFLAKLDGSCRT  
IAGQALQFRGAIAGTDAGIEL  
>E18\_CBJ30046.1\_Ectocarpus\_siliculosus  
TIGTRGSPLALAAQAYETKRRLEIQVIKTSGDMILDKPLTGKGLFTKELDVQLLNKDVDICVHSMKDVPTWIVPGTILPCNLPRDTSDAFISNI  
ASLPDGSVIGSASLRRQAQLLRANPTLRGNVQTRLRKLDATLLAFAGLRKLP AQAQAIGIQCRENDLNHQETKTA VDCERAFLAALDGNCKTP  
IAGQALVFRGAVAMGHEAGEMEL  
>E19\_XP\_009037531.1\_Aureococcus\_anophagefferens  
RIGTRGSPLALAAQAYMTRELLQICIMKTQGDMILDKALSGKGLFTKELDVALLGDEVVICVHSMKDVPTWLPKTVLPCMLEREDTRDVFISSL  
KDLKDGSGVIGSASLRRQSQILAINPTLRGNVQTRLRKLDATLLAYAGLRMPAQAQAIGIQCRDDDLNHEETFTCVSCERAFLAALDGNCKTP  
IAGQALLFDGAEEKIGREAGEGI  
>E22\_VEU41363.1\_Pseudo\_nitzschia\_multistriata  
RIGTRGSPLAMAQAFETRRRLEICVMKTQGDMILDKSLMGKGLFTKELDVALLGDEVVICVHSMKDVPTWLPDGTVLPCNFPREDTNDAFITSI  
ADLPDGSVIGTASLRRQAQILSNPTLRGNVQTRLRKLDATLLAIAGLKRM PAVAQAQAIGVQCREGDLNMDTHVCVNCERAFLEALDGNCKTP  
IAGQAIFKRGAVKIGKEAGEKL  
>E23\_OEU23734.1\_Fragilariopsis\_cylindrus  
RIGTRGSPLAMAQAFETRRRLEICVMKTQGDMILDKSLMGKGLFTKELDVALLANEVDICVHSMKDVPTWLPDGTVLPCNLPRD TNDAFITTI  
ADLPDGSVIGTASLRRQSQILMAQNPTLRGNVQTRLRKLDATLLAIAGLKRM PAVAQAQAIGIQCR TDDLNHMDTHVCVNCERAFLEALDGNCKTP  
IAGQAIFKRGAVKIGKEAGEKL  
>E25\_XP\_002292986.1\_Thalassiosira\_pseudonana  
RIGTRGSPLALAAQAYETRRRLEICVMKTQGDMILDKSLMGKGLFTKELDTALLGDEVVICVHSMKDVPTWLPDGTVLPCNLPRD TNDAFITRI  
ADLPDNSVIGTASLRRQAQILAQNPTLRGNVQTRLRKLDATLLAIAGLKRM PAVAQAQAIGIQCRSDDLNCMDTHVCVNCERAFLEALDGNCKTP  
IAGQAIVFKGAVEIGRKAGEEL  
>E26\_XP\_002179459.1\_Phaeodactylum\_tricornutum  
RIGTRGSPLALAAQAYETKRRLEICVLKTQGDMILDKSLMGKGLFTKELDTALLSDEVVICVHSMKDVPTWLPDGTVLPCNLPRD TNDAFIYRI  
EDLPDGSVIGTASLRRQAQLMAKNPTLRGNVQTRLRKLDATLLAIAGLKRM PAVAQAQAIGIQCRDDDLNHPETKACVDCERGFLEALDGNCKTP  
IAGQAIMFRGA AKIGREAGEGL  
>E27\_ABD51930.1\_Guillardia\_theta  
KLGTRGSPLALAAQAYETRRRLSINIINTSGDMELSKALSGKGLFTKELDVALLKKEVDFCVHSMKDVPTYLPDGT HLEAMPLREDTRDAFISSE  
EEMPEGTVIGSASLRRQAQIFAKNPKIRGNVQTRLRKLDATLLALAGLRMPAQAQAIGIQVRSDDLNHKDTKTCVDCERSFLATLDGSCCKTP  
IAGQAIHFRGYMKIGKDAGEEI  
>E27\_OSX71464.1\_Porphyra\_umbilicalis  
VIGTRGSPLALAAHETQRRLEIRVIHTGDMVLDKALSGKGLFTKEIDVAQLNGDVDIAVHSMKDVPTWLPDGI VLPCLMPLREDTRDVFISCL  
ADLPDGSVIGSASLRRQSQILAKFPTLRGNVQTRLKKLDATMLALAGLARMPAQAQAIGITCRAGDLTHHETLDCVRAERAFLEALD GSCRT  
IAGQAIAFRGGVAMGKDAGEEL  
>E28\_KAA8492666.1\_Porphyridium\_purpureum  
VIGTRGSPLALAAQAYETRRRLDISVINTSGDMFLDTTLAGKGLFTKEIDSAQLRGDVDIAVHSMKDVPTWLPNGI ELPCMLPRDTRDAFISGL  
SDLPDGSVIGSASLRRQSQILLAMNPTLRGNVQTRLRKLDATLLAIAGLNRMPAQAQAIGITCRSNDLNHADTLTCVSCERSFLAALD GSCRT  
IAGQALKFRGAVKIGADAGAEEL  
>E31\_XP\_024378864.1\_Physcomitrium\_patens  
RIGTRGSPLALAAQAYQTRDKLEIVIIKTGDKILSQPLAGKGLFTKEID DALLNGDIDIAVHSMKDVPTYLPEGTILPCNLPRDVRDAFICSL  
AELPEGSVVGSA S LRRQSQILLHKYPHLRGNVQTRLRKLDATLLALAGLRKLP AQAQAIGIACRTGDLNHEDTRLAVACERAF LAKLDGSCRT  
IAGLACSFGRMIALAQDAQGEL  
>E32\_OAE31707.1\_Marchantia\_polymorpha  
RIGTRGSPLALAAQAYQTRDKLEIVIIKTGDKILNQPLAGKGLFTKEID DALLGGSIDIAVHSMKDVPTYLPEGTILPCNLPRDVRDAFICSL  
AELPAGSVVGTASLRRQSQILLNKYPSLRGNVQTRLRKLDATLLALAGLRKLP AQAQAIGIACRSDDLNHEDTRLAIS CERSFLAALD GSCRT  
IAGLACTFRGMIAVGKDAGEEL  
>E33\_CEM32015.1\_Vitrella\_brassicaformis  
IIGTRGSPLALAAHETKRRLELKIIKTGDERLDIALAGKGLFTKELDVALLAKEVDICVHSMKDVPTYLPEGTVLACNLPRDTRDVFIST I  
RELDPDGSVVGSA S LRRQAQILAINPTLRGNVQTRLKKLDATMLALAGLRMPAQAQAIGAIGIQCRSDDLNCPTDKRCVDCERAFLAQLDGNCRTP  
IAGQALKFRGAVNIGKQAGEEL  
>E34\_XP\_003607331.1\_Medicago\_truncatula  
RIGTRGSPLALAAHETRDQLQIVIIKTGDKILSQPLAGKGLFTKEIDEALINGDIDIAVHSMKDVPTYLPEKTILPCNLPRDVRDAFISSL  
ADLPAGSVIGTASLRRQSQILHRYP SLRGNVQTRLRKLDATLLALAGLRKLP AQAQAIGIACRSNDLNHEETRLAIS CERAFLTTLDGSCRT  
IAGYACLFGRGMMKMGRDAGEEL  
>E35\_XP\_002507564.1\_Micromonas\_commoda  
KIGTRGSPLALAAQAYMTRDLLEICIIKTGDKVLDQPLAGKGLFTRELDVALLDGRIDIAVHSMKDVPTYLPEGTILPCMLPRDVRDAFISDL  
SELPEGSLVGTASLRRQSQILLARFPGLRGNVQSRIRKLDCTLLAIAGLNRMPAQAQAIGIACRTGDLNHEETRIAVECERSFLAALD GSCRT  
IAGFALRFNGAIAAGKEAGAEEL  
>E36\_XP\_025653893.1\_Arachis\_hypogaea

RIGTRGSPLALAAQAYETRDKLQIV I IKTGDKILSQPLAGKGLFTKEIDEALLNSEVDIAVHSMKDVPTYLPDGTILPCNLEREDVRDAFISSL  
ADLPFSGSVVGTASLRKRSQILHRYPSLRGNVQTRLRKLQATLLALAGLKRLPAVAQGAIGIACRSNDLNHEETRLAVVCERAFLLTLDGSCRTP  
IAGYACLFGRGMVEMGKDAGHEL  
>E37\_XP\_006648352.2\_Oryza\_brachyantha  
RIGTRGSPLALAAQAHETRDKLEI I IKTGDMILDKPLAGKGLFTKEIDDALLQGRIDIAVHSMKDVPTYLPEGTILPCNLPREDVRDAFICSL  
AELPAGSVVGSASLRQSQILYRYP SLRGNVQTRLRKLHATLLALAGLKRLPAVAQGAIGIACRSNDLNHEDTRLAVACEREFLSVLDGNCRTP  
IAAYACSFGRGMVALGQDAGHEL  
>E39\_XP\_003570067.1\_Brachypodium\_distachyon  
RIGTRGSPLALAAQAHETREKLEI I IKTGDMILDKPLAGKGLFTKEIDDALLQGRIDIAVHSMKDVPTYLPEGTILPCNLPREDVRDAFICTL  
AELPAGSVVGSASLRQSQILYKYP SLRGNVQTRLRKLHATLLALAGLKRLPAVAQGAIGIACRTNDLNHEDTRLAVACEREFLSVLDGNCRTP  
IAAYACSFGRGMVALGQDAGHEL  
>E40\_CBI18797.3\_Vitis\_vinifera  
RIGTRGSPLALAAQAYETRDKLQIVV IKTGDKILTQPLAGKGLFTKEIDEALLNGDIDIAVHSMKDVPTYLPDKTILPCNLPREDVRDAFISSL  
SELPAGSIVGTASLRKRSQLLHRYKSLRGNVQTRLRKLQATLLALAGLKRLPAVAQGAIGIACRSNDLNHEVTRLAVACERAFLETLDGSCRTP  
IAGYACIFKGMIMKMGDAGEEL  
>E41\_GAX77900.1\_Chlamydomonas\_eustigma  
KIGTRGSPLALAAQAYMTRDLEITI IKTGDKILNQPLAGKGLFTKEIDDALLDGRVDIAVHSMKDVPTYLPAGTILPCNLPREDVRDVFISSL  
AELPAGAVVGSASLRQQAQILNKYPHLRGNVQTRLRKL SATLLALAGLKRLPAVSGGAIGIACRDGDLNHEETRIAIVCERAFLLTLDGSCRTP  
IAGYALHFRGAIITVGTCEGAEL  
>E48\_XP\_005782931.1Emiliana\_huxleyi  
KLIGTRGSPLALAAQAYETRRRLEIKV IKTGDMVLDKALKGKGLFTKELDVSLNGDVDCVHSMKDVPTWLVPGTILPCNLPREDTRDAWISLP  
QELPDGAVIGTASLRQQAQLYAINPTFRGNVQTRLKKLDATMLAKAGLNRMPPAVAQGAIGIQIREKDLNHEPTKVAVDCERAFLLAALDGNCRTP  
IAGQALREFEGAAMKGTAGEEL  
>E49\_KAF4358603.1\_Cannabis\_sativa  
RIGTRGSPLALAAQAYETRDKLEIVI IKTGDKILTQPLAGKGLFTKEIDEALINSIDIDIAVHSMKDVPTYLPEKTILPCNLPREDVRDAFISSL  
AELPEGSVIGTASLRKRSQILHRFP SLRGNVQTRLRKLQATLLALAGLKRLPAVAQGAIGIACRSDDLNHEETRLAVACERAFLLTLDGSCRTP  
IAGYACIFRGMVMGMDAGKEL  
>C1\_WP\_008276417.1\_Crocospaera\_chwakensis  
RIGSRKSQLALVQTYWIQEQLDVETMSTQGDKILDVALADKGLFTKELETAMLQNQVDFAVHSLKDLPTNLPDGLMLGCVTERVNPADALVVQL  
DTLPEGSVIGTSSLRRLAQLRHHYPHLRGNVNTRL SKLDAI I LAVAGLQRLHAVGQGALGIECRTGDLEHPETRDRCYAEAFRLRELEGGCQVP  
IGVNTLTLTGAEKLGQELAMRL  
>C3\_HAC63707.1\_Cyanothece  
RIGSRKSQLALVQTYWVQKELDVETMSTQGDKILDVALADKGLFTKELEVAMEQNQIDLAVHSLKDLPTNLPKGLMLGCITERVDPADALVIQL  
ETLPEGAVIGTSSLRRLAQLRHHFPHLRGNVNTRLRKLDAI I LAVAGLQRLHAVGQGALGIECREGDLEHEPTRDRCYAEAFRLRELEGGCQVP  
IGVNTLTLTGAEQLGQELANLL  
>C4\_WP\_046663363.1\_Microcystis\_aeruginosa  
RIGSRKSQLALVQTYWVQAELEVETMSTQGDKILDVALADKGLFTKELEVGM LDRSIDLAVHSLKDLPTNLP EGLILGCVTERVNPADALVVQL  
DTLPAGAVVGTSSLRRLAQLRHHYPHLRGNVNTRLAKLDAI I LAVAGLERLHAVGQGALGIECRDGDLEHAPSRDRCYAEAFRLRELQGGCQVP  
IGVNTLTLTGGEVLGRDLAHKV  
>C5\_WP\_107666849.1\_Cyanothece  
RIGSRKSQLALVQTYWIQEQLDVETMSTQGDKILDVALADKGLFTKELETAMLQNQVDFAVHSLKDLPTNLP EGLMLGCVTERVNPADALVVQL  
DTLPEGSVIGTSSLRRLAQLRHHYPHLRGNVNTRL SKLDAI I LAVAGLQRLHAVGQGALGIECRSGDLEHPETRDRCYAEAFRLRELEGGCQVP  
IGVNTLTLTGAEKLGQELALRL  
>C7\_ACB53726.1\_Crocospaera\_subtropica\_ATCC\_51142  
RIGSRKSQLALVQTYWIQEBELDVETMSTQGDKILDVALADKGLFTKELETAMLQNQVDFAVHSLKDLPTNLP EGLMLGCVTERVNPADALVVQL  
DTLPEGSVIGTSSLRRLAQLRHHYPHLRGNVNTRL SKLDAI I LAVAGLQRLHAVGQGALGIECRSGDLEHTETRDRCYAEAFRLRQLEGGCQVP  
IGVNTLTLTGAEKLGEEALRL  
>C9\_WP\_152589085.1\_Nostoc\_sphaeroides  
RIGSRKSQLALVQTYWVQEQLVHTMSTQGDKILDVALADKGLFTKELEVGM LNQEIDFAVHSLKDLPTHLPEGLTLAAITERENPADALVVQI  
DTLPEGAVIGTSSLRRLAQLRHHFPHFRGNLITRLAKLDALI LAAAGLERLHAVGQGALGIECRADDIEHPETRDRLAERSFLRSLEGGCQVP  
IGVNTLTLTGAEALGIELAQVL  
>C10\_WP\_159290979.1\_Microcystis\_aeruginosa\_  
RIGSRKSQLALVQTYWVQAELEVETMSTQGDKILDVALADKGLFTKELEVGM LDRSIDLAVHSLKDLPTNLP EGLILGCVTERVNPADALVVQL  
DTLPAGAVVGTSSLRRLAQLRHHYPHLRGNVNTRLAKLDAI I LAVAGLERLHAVGQGALGIECRDGDLEHAPSRDRCYAEAFRLRELQGGCQVP  
IGVNTLTLTGGEVLGRDLAHKV  
>C11\_WP\_073548994.1\_Chroogloeocystis\_siderophila  
RIGSRKSQLALVQTYWVQEQLVHTMSTQGDKILDVALADKGLFTKELEVGMQSHEIDFAVHSLKDLPTNLP EGLMLGVVTEREDPADALVVQI  
DTLPEGAVIGTSSLRRLAQLRHHFPHLRGNLNLRLAKLDAI I LAVAGLRLHAVGQGALGIECRTDDIEHVPTRDRTLAERAFRLSLEGGCQVP  
IGVNTLTLTGAEKLGTELAQRL  
>C12\_WP\_039716212.1\_Scytonema\_millei  
RIGSRKSQLALVQTYWVQEQLVHTMSTQGDKILDVALADKGLFTKELEVGM LNQEIDFAVHSLKDLPTRLPQGIMLGAVTERENPADALVLQF  
DTLPEGAVIGTSSLRRLAQLRYHFPHLRGNVITRLQKLDALVLAVAGLQRLHAVGQGALGIECREGDIEDVPTDRALAEAFRLRELEGGCQVP  
IGVNTLTLTGAEKLGIELAQRL  
>AP2\_NVK18543.1\_Methylocystaceae\_bacterium  
VIGTRGSPLALAAQAHETDRLEIEVIKTGDMILDRPLSGKGLFTKEIDDAQLNGRIDIAVHSMKDVPTWLPDGISLPCILPREDVRDVFISSL  
ADLPKGAIVIGSASLRQAQIKAAYPHLRGNVQSRRLKLDATLLANAGMRRLPAVAQGAIGISCRSNDLNCATSHIRILAERALLRVLDGSCRTP  
IAALAIRLRGPDGLGTAKAGLEL  
>AP4\_GGF59690.1\_Terasakiella\_brassicae  
VIGTRGSPLALAAQAHETDRLEIEVIKTGDMILDRPLSGKGLFTKEIDNAQLEGRIDIAVHSMKDVPTWLP EGI DLPCILPREDVRDVFISSL  
ADLPAGSVVGSASLRQAQIKALYPHLRGNVQRRLSKLDATLLAHAGLRRLPAVAQGAIGISCRSNDLHCAQSA TRIEAEERALLRILDGSCRTP  
IAALAIIVLRGPDGLGTAKAQEL  
>AP5\_WP\_135081589.1\_Terasakiella\_sp  
VIGTRGSPLALAAQAYETRERLEIEVIKTGDMILDRPLSGKGLFTKEIDDAQLDGRVDIAVHSMKDVPTWLPDGLCLPCILPREDVRDVFISSL  
ADLPQGAIVVGTASLRQAQIKAKYPHLRGNVQSRRLKLDATLLANAGLRRLPAVAQGAIGITCRENDLNCETSKIRIEAEERALLRVLDGSCRTP  
IAALAITLRGPDLSLGTAGEEL  
>AP7\_WP\_011391315.1\_Rhodospirillum\_rubrum

RIGTRGSPLALAQTHQVRDLLTIEVIKTTGDAILDRPLSGKGLFTREIDDAMLAGTIDIAVHSMKDVPTYLPDGVLPCLMLEREDVRDAFLGRL  
ADLPEGSVVGTASLRRGAQILAMRPDIRGNVQTRLDKLDATMLAIAGLNRLPAVAQGA VGVT CRAGDLNHRATQLCVEIERAFLTRLDGSCRT  
IGGLAVFRGVALGEDAGAEEL  
>AP8\_GEO82801.1\_Pararhodospirillum\_oryzae  
MIGTRGSPLALAQTHQVRDLLGIEIKTTGDAILDRPLAGKGLFTKEIDEAMLGRIIDIAVHSMKDVPTYLPDGVLPCLMLEREDVRDAFLGTL  
ESLPTGAVVGTSSLRRGAQILAMRPDLRGNVQTRLDKLDATMLAKAGLNRLPAVAQGA VGVT CRADDLHHAETSLCVDVERAFLARLDGSCRT  
IGGLAVFRGVALGEDAGAEEL  
>AP9\_WP\_068493424.1\_Magnetospirillum\_marisnigri  
RIGTRGSPLALAQTHETDRDLLEIEVIKTTGDLVQDRPLAGKGLFTKELDEAMLSGRIHLAVHSMKDVPTLLPDGIDLPCILPREDVRDAFISSL  
ADLPEGAVIGSASLRRQAQILNRRPDLRGNVQTRLRKLDATLLAMAGLRRLPAVAQGAIGITCRSDDLNC LDSQVRVSAERAFLARLDGSCRT  
IAALALSFRGAELGRDAEEL  
>AP12\_WP\_024079153.1\_Magnetospirillum\_gryphiswaldense  
TIGTRGSPLALAQTHETDRDLAIQVIQTGDLIQNRPLAGKGLFTKELDDSM LDGRIDLAVHSMKDVPTVLPDGVLPCLMLEREDVRDAFLSGI  
DDL PQGAVVGTASLRRGAQILHRRPDLRGNVQSRLRKLDATLLAMAGLNRLPAVAQGAIGITCRADDLNCPETMIRITAERAFLTLTDGSCRT  
IAALALSFRGAHAMGVDAEEL  
>AP16\_WP\_114121889.1\_Thalassospira\_xianhensis  
RIGTRGSPLAMAQAHEVRDKLAI TVITTTGDKILDRALSGKGLFTKEIDDALMGGEIDLAVHSMKDVPTVLPDGMILPTILPREDVRDAFISSF  
AEMPAGSVIGSASLRRQAMILNKYPDLRGNVQTRLRKLDATLLAMAGLNRLPAVAQGAIGITIRENDLNC PASAICVTAERAALRALDGSCRT  
IAALAMRLRVAATAAGVDAGNEL  
>AP18\_WP\_022732749.1\_Thalassospira\_lucentensis  
RIGTRGSPLALAMAQAHEVRDKLAI TVITTTGDKILDRALSGKGLFTKEIDDALMGGEIDLAVHSMKDVPTVLPDGMILPTILPREDVRDAFISSF  
AEMPAGSVIGSASLRRQAMILNKYPDLRGNVQTRLRKLDATLLAMAGLNRLPAVAQGAIGITIREDDLHCEKSAIRVAGERAALFALDGSCRT  
IAALAMRLRVAATAAGVDAGNEL  
>AP20\_MBB21022.1\_Rickettsiales\_bacterium  
RIATRKSALAMWAQYVQAKLELVPMSTQGDRI LDTPLAGKGLFIKELEVAMSEGRADIAVHSMKDVVPDFPEGFGLHCICERENPYDAFVSSI  
EELPQGAIVGTSSLRRQCIQSARPDRLRGNVNTRLAKLD AII LAAAGLIRLPAVGQGA VGIECRNDDLHNSNTESRVKAERAMNAKLNCGCQVP  
IGSYALYLRGAISIGVDVAEQ  
>AP21\_WP\_143689836.1\_Wolbachia\_Nilaparvata\_lugens  
KIGTRGSDLAIIQALEAKQRLEIKIKTSGDKYANVTLAGKGLFLREIEAELENNIDMAVHSLKDVPAFFSKDLTIPCVLERLSPCDVFVSSL  
KTLPQQATIATSSIRRVQLLNFRPDLRGNVTRLQNDGMILAKAGLIRLNAVGGQAICIQCRKNDINNMSFIRAKSERSFMKTVNGSCFT  
LAALALRLRCAEKIGMDAGLEL  
>AP23\_WP\_167896255.1\_Wolbachia\_Brugia\_pahangi  
RIGTRGSSLAIIQALEAKQKLEIKIKTSGDKYANANLAGKGLFIKEIETELIKSNIDMAVHSLKDVPAFFSKDLTIPCILERLSPYDTFISSL  
KALPQQAIATSSIRRVQLLNFRPDLRGNVTRLQNDGII LAEAGLIRLSAVGGQAICIQCRKNDINNKS FIRVKERSERSFMKTVNGSCFT  
LAALALHLYCAEKMGM DAGLEL  
>AP24\_WP\_182367144.1\_Wolbachia\_pipientis  
KIGTRGSKLAVAQALEAKQKLEIVKIKTSGDKYANANLAGKGLFIKEIETELLENNIDMAVHSLKDMPAFFSGGLTIPCVLERLSSCDAFISSL  
ESLPQQATIATSSIRRVQLLNKVPDLRGNVTRLQNDGII LAEAGLIRLSAVGGQAVCIQCRNDINNMSF IGVKERSERSFMKTVNGSCFT  
LAALALHLRCAEKMGM DAGLEL  
>AP25\_QLK56876.1\_Ehrlichia\_ruminantium  
YVGTRGSILAIQAAMEVKLLQIVHIVTSGDINDKISLSGKGLFLKELEEALLTGTIDLAVHSMKDVPAFYCDGLVIPCILKRISPYDVFIS  
KSLPDNAVIGTSSIRRVQLMRLSSVRGNVDTRILKLDGII LAEAGLIRLSAVGGQAICIQCRANDLNCKKSYISVAAERSFMKTVNGSCDTP  
LAALALYMSCAEISGINMGNL  
>AP26\_WP\_011114401.1\_Anaplasma\_marginale  
RLGTRGSTLALIQAEVKAADVTIKIKTSGDIKVDRPLCGKGLFIKEIEEALLANKIDIAVHSAKDVPGFYSENLDMPCVLKRSPMDVFISSL  
NSLPAGAKIGTSSIRRVQLLAFRPPDLRGNVDTRI AKVDGIVLAEAGVDRIGAVGGQAICVQCRKSDLN DHESFTAVLAERSFMKAVNGSCHT  
LAAMAMSMKCAESVGFEMGVML  
>AP27\_WP\_040255795.1\_Rickettsia\_hoogstraalii  
RIGTRKSPALQTNLV IQQIEIVPIITSGDLIQNKPLYGKALFLKEIEQALLDKKIDLAVHSLKDVPGRIPEELVIAAVLEREDPRDVFVCSI  
EELPQNAVIGSSAVRRKAFIQKIRPDLRGNVDSRIKKLDATILAYAGLRLPCIGQGVI AVEIRQNDINH IPTFELIKPERAFLEYLDANCRT  
IAAYSIKNNFSKEAGIKA AKMM  
>AP28\_WP\_012148629.1\_Rickettsia\_canadensis  
RIGTRKSPALIQTNLVIQQIEIVPIITSGDLIQNKPLYGKALFLKEIEQALLDKKIDLAVHSLKDVPGRIPEELVIAAVLEREDPRDVFVCSI  
EELPQNAIIGSSAVRRKFTFIEKIRSDLRGNVDSRIKKLDATILAYAGLRLPCIGQGVI AVEIRKDDINH LPTFELIKPERAFLEYLDANCRT  
IAAYSIEDTFSKEAGIKA AKMM  
>AP29\_WP\_011477036.1\_Rickettsia\_bellii  
RIGTRKSKLALTQTNLVIEQIEIVEITSGDLIQNKPLYGKALFLKEIEQALLNKKVDLAVHSLKDVPGIIPKDLSEI AVLEREDSRDVFVCSI  
EELPKNAVIGTSSVRRLKCVQMRPDLRGNVDSRIKKLDATILAYAGLRLPCIGQGVI AVEIRKDDINH LPTFELIKPERALLEYLDANCRT  
IGAYSIQTDFSKESGIKA AKMM  
>AP31\_KJV80341.1\_Rickettsia\_hoogstraalii  
RIGTRKSPALIQTNLVIQQIEIVPIITSGDLIQNKPLYGKALFLKEIEQALLDKKIDLAVHSLKDVPGRIPEELVIAAVLECEDPRDVFVCSI  
EELPQNAVIGSSAVRRKAFIQKIRPDLRGNVDSRIKKLDATILAYAGLRLPCIGQGVI AVEIRQNDINH IPTFELIKPERAFLEYLDANCRT  
IAAYSIKTNFSKEAGIKA AKMM  
>AP32\_WP\_032138717.1\_Rickettsia\_tamurae  
RIGTRKSPALIQTNLVIQQIEIVPIITSGDLIQNKPLYGKALFLKEIEQALLDKKIDLAVHSLKDVPGRIPEELVIAAVLEREDPRDVFVCSI  
KELPQNAVIGSSAVRRKAFIQKIRPDLRGNVDSRIKKLDATILAYAGLRLPCIGQGVI AVEIRQDDINH IPTFELIKPERAFLEYLDANCRT  
IAAYSIQTDFSKESGIKA AKMM  
>AP33\_WP\_041079570.1\_Rickettsia\_asebonensis  
RIGTRKSPALIQTNLVIQQIEIVPIITSGDLIQNKPLYGKALFLKEIEQALLDKKIDLAVHSLKDVPGRIPEELVIAAVLEREDPRDVFVCSI  
EELPQNAVIGSSAVRRKAFIQKIRPDLRGNVDSRIKKLDATILAYAGLRLPCIGQGVI AVEIRQNDINH IPTFELIKPERAFLEYLDANCRT  
IAAYSIQTDFLKESVIKA AKMM  
>AP34\_WP\_015508436.1\_Rickettsia\_prowazekii  
RIGTRNSTLALIQTNLVIEQIEIVPIITSGDLIQNKPLYGKALFLKEIEQALLDKKIDLAVHSLKDIPGKIPVELVIAAVLEREDPRDVLVCSI  
ETLPQNAVIGSSAVRRKAFIKLRPDLRGNVDSRIKKLD AII LSYAGLRLPCIGQGVI AVEIRKDDINH LPTFELIKPERAFLEYLDANCST  
IAAYAIQIDFSKICGIKA AKMM  
>AP42\_WP\_103897011.1\_Rickettsia\_fournieri



RIGTRKSPLALIHTNLVQQIEIVPIITSGDLIQNKPLYGKALFLKEIEQALLDKKIDLAVHSLKDVPGRIAPAPLVIAAVLEREDPRDVFVCSI  
EELPQNAVIGSSAVRRKAFIQIRPDLRGNVDSRIKKLDATILAYTGLKRLPCIGQGVIAVEIRKDDINHLPTFELIKPERAFLEYLDANCRT  
IAAYSIQTDFSTEAGIKAAMM  
>AP43\_WP\_045800397.1\_Rickettsia\_amblyommatidis  
RIGTRKSPLALIHTNLVQQIEIVPIITSGDLIQNKPLYGKALFLKEIEQALLDQKIDLAVHSLKDVPGRIPEPLVIAAVLEREDPRDVFVCSI  
EELPQNAVIGSSAVRRKAFIQIRPDLRGNVDSRMKKLDATILAYTGLKRLPCIGQGVIAVEIRKDDINHLPTFELIKPERAFLEYLDANCRT  
IAAYSIQTDFSTEAGIKAAMM  
>AP44\_WP\_010422890.1\_Rickettsia\_helvetica  
KIGTRKSPLALIHTNLVQQIEIVSIITSGDLIQNKPLYGKALFLKEIEQALLDKKIDLAVHSLKDI PGRIPEELVIAAVLEREDPRDVFVCSI  
EELPQNAVIGSSAVRRKAFIQIRMDLRGNVDSRIKKLDATILAYAGLKRLPCIGQGVIAVEIRQDDINHLPTFELIKPERAFLEYLDANCCTP  
IAAYSIKTDFSTEAGIKAAMM  
>AP45\_WP\_145622287.1\_Nitrospirillum\_amazonense  
RIGTRGSPLALAQAHETRDRLEIVVIKTGDRILDRTLAGKGLFTKEIEDALLAGEIDLAVHSMKDVPTVLPDGLDITCLLPREDPRDAWFSTL  
MELPAGAVVGTSALRRQAQVRLARRPDLRGNVQTRLRKL DATLLAMAGLRRLPAVAQGAIGIEARIADLNCA TALRVTAERGVL TALDGSCTP  
IAALAMDMEAAARAAGDDAGAEEL  
>AP46\_WP\_044558528.1\_Azospirillum\_sp  
RIGTRGSPLALAQAHETRDRLEIVVIKTGDRILDRTLAGKGLFTKEIEDALLAGEVDLAVHSMKDVPTVLPDGLGITCLLPREDPRDAWFSGL  
LDLPAGAVVGTSALRRQAQVRLARRPDLRGNVQTRLRKL DATLLAMAGLRRLPAVAQGAIGIETRLDDL NCAETALRVTAERGVL TALDGSCTP  
IAALAMDLEAALAAGDDAGQEL  
>AP48\_WP\_014415752.1\_Pararhodospirillum\_photometricum  
TIGTRGSPLALAQTHQVRDLLAEIVVIKTGDAILDRLAGKGLFTKEIDEAMLSGRIDIAVHSMKDVPTYLPDGLIVLPCMLEREDVRDAVIGSI  
DALPLGAVVGTSALRRGAQILAKRPDLRGNVQTRLAKL DATLLAKAGLNRLPAVAQGAVGVTCRADDLNHAETFLCVTVERAFLAKLDGSCRT  
IGGLAVFRGAVLALGDDAGAEEL  
>AP51\_WP\_008616862.1\_Magnetospirillum\_caucaseum  
RIGTRGSPLALAQTHETRDRLEIVVIKTGDLVQDRPLAGKGLFTKELDEAMLSGRIHLAVHSMKDVPTQLPDGLIVLPCILAREDVRDAFISSL  
ADLPQGA VVGTSALRRGSQILHRRPDLRGNVQTRLRKL DATLLAMAGLRRLPAVAQGAIGITCRAGDLNCPDSFVRVAAERAFLTRLDGSCRT  
IAALALSFRGAEMGKDAEEL  
>AP55\_WP\_074770425.1\_Phaeospirillum\_fulvum  
RIGTRGSPLALAQTYETRERLEIEVIKTGDMVLDRLPLSGKGLFTRELDEAMLDRIRIAVHSMKDVPTYLPDGLIVLPCILPREDVRDAFICSI  
ADLPAGSVIGSSSLRRGAQILNRRPDLRGNVQTRMRKL DATLLAMAGMRRLPAVAQGAIGITCRADDLNCKDSFVRVAAERAFLTKLDGSCRT  
IAALAMLFRRGVAAMIDAEEEL  
>AP57\_WP\_043745666.1\_Magnetospirillum\_magneticum  
RIGTRGSPLALAQTHETRDRLEIVVIKTGDLVQDRPLAGKGLFTKELDEAMLSGRIHLAVHSMKDVPTQLPDGLIVLPCILPREDVRDAFLSSL  
AELPQGA VVGTSALRRGAQILHRRPDLRGNVQTRLRKL DATMLAMAGLRRLPAVAQGAIGITCRADDLNCPDSFVRVAAERAFLTRLDGSCRT  
IAALALSFRGAEMGKDAEEL  
>AP59\_WP\_042695698.1\_Azospirillum\_sp  
RIGTRGSPLALAQAHETRDRLEIVVFKTGDRILDRTLAGKGLFTKEIEEALFDGRADLAVHSMKDVPTQLPDGLEIATLLPREDPRDAFFSGL  
ADLPAGAVVGTSALRRQAQVLELRPDLRGNVQTRL SKLDATLLALAGLRRLPAVAQGAIGIEIRSDDL NCAETMVRVTAERALLAALDGSCTP  
IAALALHLRAESMGADAGAEI  
>AP60\_WP\_155189669.1\_Roseibium\_denhamense  
RIGTRGSALALAQAEETRDRLEIVVIKTSGDRIQDRPLSGKGLFTKEIEEALLDKSIDIAVHSSKDMPTVLPDGLELTAFLPREDVRDAFLSTL  
TDLPHGAVVGSSSLRRQAMIRLRPDIRGNLQTRMRKL DATLLAAAGLRRLPAVGQGAICIESRSGDIHDPETQIRLDAERAFLAVLDGSCRT  
IGGLALRFKGAVAIGEAIGQEL  
>AP61\_WP\_007255416.1\_Oceanicola\_granulosus  
KIGTRGSPLALAQAHETRDRLEVVVIRTGDRVDRPLKKGKGLFTKEIEEAMLSGAIDIAVHSMKDMPPVAQPEGVLVDCYLPREDPRDAFVSGI  
KALPDGATVGTSSSLRRKAQLLHRRPDLRGNVQTRLRKL VATFLAVAGLNRLPAVAQGAIGIERRASDIHDRATGERLAAERAFLAALDGSCTE  
IAGLALRLRGGAALGTMARRL  
>AP62\_PID35544.1\_Rhodobacterales\_bacterium  
RIGTRGSPLALAQAYETRRLLEIVVIKTGDDRADRPLKNKGLFTKEIEEQLLSGEIDIAVHSSKDMPTQPEGVLVDCFLPREDPTDAFVSSL  
AELPEGAVVGTSALRRQAQVLRHRRPDLRGNVQTRMRKL DATFLAMAGLNRLPAVAQGAIGIERRVGDIQDAETGQRLAAERAFLAALDGSCTE  
IAGLALHLRGAEISGAALAQDL  
>AP63\_WP\_085869129.1\_Pseudoeugenia\_aquimaris  
KIGTRGSPLALAQARETRARLEIVVIKTGDDRADRPLKNKGLFTKEIEEAMLAGTIDIAVHSSKDMPPVEQPQGLVLDLFLPREDVRDAFISNI  
AALPPGAVVGTSALRRKAQLLNVRPDLRGNVQTRLRKLQCTFLAMAGLNRLPAVAQGAIGIERRESDLHCTETGRLAAERAFLARLDGSCTE  
IAGLALTLRGAKALGTELAETL  
>AP64\_WP\_148633458.1\_Rhodobacterales\_bacterium  
RIGTRGSALALAQAHETRDRLEIVVIKTSGDRIQDRPLSGKGLFTKEIEEALLDGRIDLAVHSSKDMPTVLPDGLIALTAFLPREDVRDAFLSTL  
EDLPHGAVVGSSSLRRQAMIKLRPDIRGNLQTRLRKL DATLLAAAGLRRLPAVGQGAICIESRENDIHDQETQIRLDAERAFLAVLDGSCRT  
IGGLALHFKGAVEIGKAAGAVL  
>AP65\_WP\_121163363.1\_Roseovarius\_spongiae  
KLGRGSPLALAQAYETRARLEIVVIKTGDRVIDRPLKKGKGLFTREIEQALLAGRIDLAVHSMKDMPPVLQPEGLLDLYLPREDPRDAFVSGL  
AELPDGAKVGTSALRRQAQVLVAYPALRGNVQTRLKKLACTFLAVAGLNRLPAVAQGAIGIERRADDIHDHETGLRIAAERAFLAELDGSCTE  
IAGLALRLRGGAELGRAMARDL  
>AP66\_WP\_106753742.1\_Pannonibacter\_carbonis  
RIGTRGSALALAQAHETRSLDIVVIKTSGDQIQDRPLSGKGLFTKEIEEALLDGRIDIAVHSSKDMPTHLPGGLIALTAFLPREDVRDAFISRL  
EDLPQGA VVGSSSLRRQAMIKLRPDIRGNVQTRLKKL DATLLAYAGLRRLPAVGQGAICIESRAADIHHRETELRLTCERAFLAELDGSCTP  
IGGLALSFRGAEAIGREAGRSL  
>AP68\_WP\_009806314.1\_Pseudoceanicola\_batsensis  
KIGTRGSPLALAQAEHRDRLEVCVIQTGDRVQDRPLKKGKGLFTREIEHALLTGIDIAVHSMKDMPPVLQPEGLLDLYLPREDPRDAFVSRL  
DQIPAGARVGTSALRRQAQVLVRRPDLRGNVQTRLRKL SATFLAMAGLNRLPAVAQGAIGIERREDDIHDPETARQLAAERAFLAALDGSCTE  
IAGLALRLRGGAELGREGMAAL  
>AP69\_WP\_075283376.1\_Labrenzia\_aggregata  
RIGTRGSALALAQAHETRDRLEIVVIKTSGDRIQDRPLSGKGLFTKEIEEALLDGRIDLAVHSSKDMPTVLPDGLIALTAFLPREDVRDAFLSTL  
TDLPPGAVVGSSSLRRQAMIKLRPDIRGNLQTRLRKL DATLLAAAGLRRLPAVGQGAICIESRADDIHDAAATQIRLDAERAFLAVLDGSCRT  
IGGLAMHFRGAARIGRSVGEDL  
>AP70\_WP\_150495167.1\_Roseibium\_aquae



RIGTRGSALALAAQAHETRSLRLEIVVIKTSQDQIQDRPLSGKGLFTKEIEDALLDGRIDLAVHSSKDMPTVLPGGLAITAFLPREDVDRDAFLSTL  
MDLPHGAVVGSSSLRRQAMIKRLRPDIRGNLQTRLRKLDATLLAHAGLRRLPAVGQGAICIESRIDDIHLETKIRLTAERAF LAVLDGSCRTP  
IGGLALTLKGAEAIKGAAGETL  
>AP71\_WP\_074785829.1\_Roseovarius\_tolerans  
KIGTRGSPLALAAQAHETRARLEIVVIKTGDRIIDRPLKGKGLFTREIEEALLSGEIDIAVHSMKDMPTVLQPEGLSLD TYLPREDVDRDAFVSAL  
ADLPAGARVGTSSLRRRAQVLVAYPHLRGNVQTRLKKLACTFLAMAGLNRLPAVAQGAIGIERADDLHD TETGQRLAAERAFLEALDGCSETP  
IAGLAVRLRGGAELGRAMAAKL  
>AP72\_TW I79925.1\_Roseibium\_hamelinense  
RIGTRGSALALAAQAHETRARLEIVVIKTGDRIQDRPLSGKGLFTKEIEEALLDSRIDLAVHSSKDMPTVLPDGLALTAFLPREDVDRDAFISTL  
AGLPEGAVVGSSSLRRQAMIKRLRPDIRGNLQTRLRKLDATLLAYAGLRRLPAVGQGAICIESRVGDIHQDTHVRLETERAF LAVLDGSCRTP  
IGGLAIRFRGPEGLGRSAGEAL  
>AP73\_WP\_095638908.1\_Paracoccus\_salipaludis  
RIGTRGSALALAAQAHETRDRLEIVVIKTGDRVLDRLRGKGLFTREIEDALLDQRIDIAVHSMKDMPTVLQPEGLIIDCYLPREDVDRDAFVSSI  
AELPAGTLVGSSSLRRRAQLIHYRPDLRGNVQTRMRKLEATFLAMAGLTRLPAPAQGAIGVERRKDDISDLP TTVLRVTAERAFRLLDGSCSETP  
LAGLALWLRGADIEMGRDLAEEL  
>AP74\_WP\_185663916.1\_Novosphingobium\_flavum  
KLGTRRSPLAMAQAEERARLEIVPVTASGDRIQDRPLAGKALWTKELDAWLLAGEIDFAVHSLKDVETIRPAGIAIAAILPREDVDRDLVGS I  
HALPRGARVGT SAPPRRAQLLHARPD CRGNVATRLAKLDATLLALAGLNRLPAPGQGAIAIECRAGDINDTPSHAAVTAERALLAALGGNCHSP  
IAVLTTLVMEADDAAPGRDLAADDL  
>AP75\_OYY76903.1\_Sphingomonas\_sp  
RLGTRGSPLALTQARMVRDALEIVVIKTGDRVQDRALAGKALWTKELDRAILAGEIDLAVHSMKDVETIRPEGIVISAMLPADVDRDLIGSI  
DALPQGATIGTSSPRRQALLRLRPDLRGNVDTLAKVDATLLAAAGLDRLPAPAQGAIGVETRAADISHHPTMACVMAERALLALNADCHSP  
LAALALHLRADLGFMAQLAADDL  
>AP76\_WP\_184051858.1\_Sphingobium\_sp  
RLGTRGSPLALAAQELTTAALRIVTVSTSGDRIQDRPLAGKALWTKELDRALLAGEIDCAVHSMKDVETIRPETITIAAML PRAATQDRLIGSI  
AAIPEGAVIGTSSPRRAQMKA LRPD LRGNVATRLARVDATLLAAAGLDRLPAPAQGAIGVETRAADIGDAATEACVRAERALLALGGSCHSP  
IAALAIRLRAPEAGAMTLGKEL  
>AP77\_WP\_037498745.1\_Sphingomonas\_jaspsi  
RLGTRGSPLALAAQAHMVAAALAIHTVKTSGDRIQDRPLAGKALWTKELDVALLAGD TDISVHSMKDVESERPDI LVIAAMLPRADVDRDLIGSI  
AALAAGATVGTSSPRRAQLRGKRPDLRGNVDTLAKRDATLLAAAGLDRLPAPAQGAIGVETRAADIGDADTHAAVMAERAYTRALGGTCHSP  
VAALAVDFRCDDVGPAAALAREM  
>AP79\_NOU03564.1\_Novosphingobium\_sp  
RLGTRRSPLAMAQAEETRARLVIVPVTASGDKVLDRLPLAGKALWTKELDAWLLGGEIDIAVHSAKDVETERPDWLTIAAVLPREDVDRDLVGS L  
AALPPGARIGTSAPPRRAQALHLRPDCRGNVQTRLAKLEV TLLAAAGLNRLPAPGQGAIAIECRTADIDHLP SRHAVMAERALLAALGGNCHSP  
IAVLTTLTMRADHAGPAALAADL  
>AP82\_WP\_147089116.1\_Novosphingobium\_ginsenosidimutans  
RLGTRRSPLAMAQAEERDRLEIVPVQASGDKILDRPLAGKALWTKELDVWLLAGEIDFAVHSAKDVETLRPAGIAIAAVLPADVDRDLVGS L  
AALPPGARIGTSAPPRRAQALHFRPD CRGNVATRLGKLDVTLLAAAGLERLPAPGQGCIAIECRPGDIDHRASHAALLAERALLAALGGNCHSP  
IAALTTLVLHADATGPAELARLL  
>AP83\_WP\_084573281.1\_Erythrobacter\_vulgaris  
RLGTRRSPLAMAQAEERARLEIVPVVASGDKIQDRPLAGKALWTRELDIWLAEKGIDAAVHSMKDVETIRPAEIAIGAILPRADKADVLLGSL  
SAIPQGARVGT SAPPRRAQLLHARPD LRGNVATRMAKLDATFLAAAGLARLPAPAQAAIGIECRVDDINHRPSAEVLAERALLEGLGGTCHSP  
IAALTTHMTADLDAARNLASEL  
>AP84\_WP\_082134782.1\_Croceicoccus\_naphthovorans  
RLGTRRSPLAMAQAYEARTRLEIVPVLASGDKVLDRLPLAGKALWTKELDGWLIENRIDFSVHSMKDVETIRPEQIAIAALLPRADVDRDLVGS I  
SQIPPGARVGT SAPPRRAQMLNLRPD LRGNVATRLAKLEV TLLAAAGLQRLPAPAQGAIGIECRVDDID DAPTRAQVMAERALLALGGNCHSP  
IAVWTLTMTAKSDGPAELARQL  
>AP85\_WP\_118054708.1\_Altererythrobacter\_sp  
RLGTRNSPLAMAQAYETRQRLELVPVVASGDKVLDRLPLAGKALWTKELDHWLHEGRIDASVHSMKDVETLRPETLTIAAVLPADTADRLVGS V  
ADIPEGATIGTSAPPRRAQLLHARPD CRGNVATRLSKLDCTLLASAGLDRLPAPAQGAIGIECRTDDINHAPSQAVMAERALLKALGGNCHSP  
IAMLTALRCDL SWIEAMGEDL  
>AP87\_WP\_138011819.1\_Chakrabartia\_godavariana  
KLGTRASPLALAAQAHMVRDALEIAAMTASGDRIILDRPLAGKALWTKELDRALFEGEIDFAVHSMKDVETLRPAELAIIVAMLPADVDRDLIGSI  
AALPQGARVGTSSPRRAQLLRHRPD LRGNVATRLAKLDATLLAAAGLDRLPAPAQGAIGIETHAANINDAATFACVMAERAF LATLTADCHSP  
VAAQALHIRG----PVALAQAL  
>AP88\_WP\_100259400.1\_Erythrobacter\_seohaensis  
RLGTRRSPLAMAQAEERARLEIVPVIASGDKIQDRPLAGKALWTRELDLWLVEGRIDAAVHSMKDVETIRPDEIAIGAILPRADKADVLLGSI  
SAIPQGA KVGT SAPPRRAQLLHARPD LRGNVATRMAKLDATFLAAAGLSRLPAPAQAAIGIECRASDISHAESREVLAEERALLQGLGGTCHSP  
IAVLTTLTMRADLAAPGELARTL  
>AP89\_WP\_184197288.1\_Polymorphobacter\_multimanifer  
KLGTRGSPLALAAQANMTAAALEIVVINTKGDQVQDRALAGKALWTKELDAALLDGRIDCGVHSMKDVETQLRDGIALAAMLPRADVRERLLGSI  
AALPQGA VIGTSSPRRAQLKALRPDLRGNVATRMKV DATLLAAAGLDRLPASAQGAIGITARLGDID DADTHAAVLLERGFLAALGGSCHSP  
VAALAVHFRAADEVAALAVRL  
>AP90\_WP\_082836126.1\_Croceicoccus\_sp  
RLGTRSSPLAMAQAEERARLEIVPVMASGDKVLDRLPLAGKALWTKELDGWLHEGLIDFAVHSMKDVETIRPDWLEIAALLPRADVDRDLVGS V  
SAIPPGSRIGT SAPPRRAQMLNLRPD LRGNVATRLAKLDVTLLAAAGLERLPAPAQGAIGIECRNDID DGATRAQVMAERALLYALGGNCHSP  
VAVWTLTMTAGPAGAAELAHKL  
>AP91\_WP\_123154477.1\_Aestuariaisphingobium\_litorale  
KLGTRASPLALAAQAHMVRDALEIVAMTASGDRIILDRPLAGKALWTKELDRALFEGEIDFAVHSMKDVETLRPAELAIIVAMLPADVDRDLIGSI  
AALPLSARVGTSSPRRTAQLLRHRPD LRGNVATRLAKLDATLLAAAGLDRLPAPAQGAIGIETHGANINDAATFACVMAERAF LATLSADCHSP  
VAAQALHIRGPVAL----AQAL  
>AP92\_WP\_160766511.1\_Erythrobacter\_citreus  
RLGTRRSPLAMAQAEERARLELVPVVASGDRIQDRPLAGKALWTRELDQWLVEGRIDGAVHSMKDVETLRPEAIAIAAILPRADKADRL LGAI  
SDIPAGARIGTSAPPRRAQLLHLRPDLRGNVATRMAKLDATFLAAAGLDRLPAPAQAAIGIECRSGDID DAPSHAEEVAAERRLLEGLGGSCSSP  
IAALSIALTADDAAPLALARGL  
>AP93\_WP\_160729335.1\_Altererythrobacter\_luteolus

RLGTRQSPPLAMAQAEETRRRLLELVKVRASGDKIQDRPLAGKALWTRRELDIWLAEGRIDA AVHSMKDVETLRPESLTIAAILPRADV RDVLIGSI  
QSI PRGAVVGT SAPRR AQLLHHRPDCRGNVATRLAKLQATFLAAAGLERLPAPAQGAIGIECNTDDINH QGSRD TVMAERALLEALGGTCHSP  
IAVLSLTMKADLDAARTLGRDM  
>AP94\_WP\_088306676.1\_Novosphingobium\_sp  
RLGTRRSPLAMAQAE EAKARLEI VPV TASGDKIQDRPLAGKALWTKELDHWLLTGEIDFAVHSLKDVETLRPAELVIAAVLPREDV RDVLVGS I  
RALPQGA VVGT SAPRR AQLLHARPDLRGNVATRLAKLDATLLARAGLNRLPAPGQGAIAIECRLDAIDHTPSRHAVMAERALLAGLGGNCHSP  
IAVLT TLVMRADANGPAALAAQL  
>AP99\_WP\_187449658.1\_Caulobacter\_sp  
RIGTRASKLAQTQTRHMQARIPLVITTTGDRIQDRRLLGKALFVKEIEEALLAGEIDVAIHSMKDVPAEQPAGLTIAAIPEREDPRDAFVSSL  
AELPQGARLG TASLR RQAQT LADRPDLRGNVDTRLRKLDAILLAKAGLNRLPAPGQGA LAIQSRVVDLHHAPTALAVAAERGALEALEGSCRTA  
VGAFALVMTVARELGDLGRQI  
>AP100\_WP\_111527206.1\_Phenylobacterium\_sp  
RIGARGSKLSLAQAGHMQRRIP LIVITTTGDRVQDRRLLGKGLFTKEIEEALLDGRIDCAVHSMKDMPADLPEGLCIAAIPEREDPRDAFVSRL  
EDLPKGARLG TASLR RQAQSLHRRPDLRGNVDTRLAKLDAILLAYAGLRRLPAPGQGA LAIETRISDLRDHPTTVAVAAERGALEALEGSCRTA  
IGAFALKLIVARALGVLGEAV  
>AP101\_WP\_167175504.1\_Brevundimonas\_terrae  
RIGTRRSKLALAQSGMMQRAIP LVEIVTTGDRIQDRRLLGKSLFTKEIEEALLEGRVDVAVHSMKDVPAEQPDGLALAAIPEREDPRDAFISSL  
ADLPQGA KVGTASLR RQAQSLSRPDLRGNVDTRLRLDAILLACSGLNRLPAPGQGA LALQTRASDLNHIPTALCVVAERGAMLALEGSCRT P  
VGAFALHIGTITALLGRGDAV  
>AP103\_OXE37704.1\_Phenylobacterium\_zucineum  
RIGARGSKLSLAQAGHMQRAIP L VITTTGDRVQDRRLLGKGLFTKEIEDALLSGEIDCAIHSLKDMPAACPPGLVIAAIPEREDPRDAFLSRL  
EDLPQGARLG TASLR RQAQSLYRRPDLRGNVDTRLAKLDGILLALSGLKRLPAPGQGA LAIQTRVEDLRHEPTVVAIAAERGALSLELGSCRT P  
IGAFALHLIVARALGVLGEAV  
>AP105\_WP\_183202760.1\_Brevundimonas\_lenta  
LIGTRRSKLALTQSGMMQRAIRLVEIVTTGDQVQDRRLLGKALFTKEIEEALLAGRVDVAVHSMKDVPAEQPYGLAIAAVPEREDPRDAFVSSF  
DELPMGARLG TASLR RQAQALARPDLRGNVDTRLRKLDAILLAVSGLNRLPAPGQGA LALQTRVEDLNHPLTALAVAAERGAMTALEGSCRTA  
IGAFALHTTARALGVLGEAV  
>AP106\_MBA4095202.1\_Rhodospirillum\_sp  
RIGTRGSPLALAQADEAHARLEICVIKTGDRVQDRPLSGKGLFTKEIEEALVAGAI DIAVHSMKDVPTWLPDGLVIDCLLPREDPRDVLIASI  
ATLPRGAVVGSASLRRAQVKALRPDLRGNVETRIAKVTATLLALAGLRRLPAVAQGAIGLETRAGDLNDRNTQLRVAERACLAVLDGSCRT P  
IAAFAMRLRAAAALGIQGRKL  
>AP108\_WP\_012567533.1\_Rhodospirillum\_centenum  
RIGTRGSPLALAQAHETRRRL EIVVIKTGDRILDRTL MGKGLFTKEIEEALQAETIDLAVHSMKDVPTWRQTGLQLTAMLPREDPRDAWFCGL  
DELPAGAVVGTASLR RQAQILARRPDLRGNVQTRMTKL DATLLALAGLRRLPAVAQGAIGIETRAADLNHAETMTRVTAERGVLATLDGSCRT P  
IAALALTLSAAEAMGIDAGQEL  
>GP2\_WP\_041406288.1\_Shewanella\_loihica  
RIATRKSPLAMWQAEFVKA ELELPMSTKGDVILDTPLAGKGLFVKELEVAMLE GKADIAVHSMKDV PVDFPEGLGLQVICEREDPRDAFVSNI  
EELPQGAIVGTSSLR RQCQIRAR PDLRGNVGTRLAKLD AII LAAAGLRKL PANGQGA VGIECRTDDLEH IETRYVIAERAMNTRLEGGCQVP  
IGAYALSLRGAEQLGIALADEL  
>GP3\_WP\_153858699.1\_Serratia\_proteamaculans  
RIATRQSPALWQAHYVQQRLELVPMVTKGDI ILDTPLAGKGLFVKELELALLDGRADIAVHSMKDV PVDFPAGLGLVTICERDDPRDAFVSSL  
DQLPQGSVVGTSSLR RQCQLRERRPDLRGNVGTRL SKLD AII LAVAGLRKL PAVGQGA VGIECR LDDLNHAVTETRVRAERAMNTRLEGGCQVP  
IGSYALWLRAAEQMGIELAEEL  
>GP4\_WP\_125868777.1\_Pseudomonas\_stutzeri  
RIATRKSALALWQA EYVKARLSLVPMVSRGDKLLDAPLAGKGLFVKELE TALLENEADIAVHSMKDV PMEFPEGLGLYCICEREDPRDAFVSSL  
DALPQGSVVGTSSLR RQAQLLAR PDLRGNVNTRLAKLD AII LAAAGLIRLPAGGQGA VGIECRTGD LNHAPTATRVVAERALNKR LNGGCQVP  
IACYALWLRGAELGVQVAEEL  
>GP5\_WP\_073262886.1\_Pseudomonas\_punonensis  
RIATRKSALALWQA EHVKARLSLVPMVSRGDKLLDAPLAGKGLFVKELE TALLENQADIAVHSMKDV PMDFPEGLGLFCICEREDPRDAFVSSL  
DALPAGSVVGTSSLR RQAQLLAR PDLRGNVNTRLAKLD AII LAAAGLIRLPAGGQGA VGIECRVGD LNHHTETALRVTAERAMNKR LNGGCQVP  
IACYALWLRGAELGIEVAEAL  
>GP6\_WP\_120134465.1\_Rahnella\_woolbedingensis  
RIATRQSPALWQAQYVQSQLELVPMVTKGDII LDTPLAGKGLFVKELE LAML DGRADIAVHSMKDV PVDFPEGLGLVTICEREDPRDAFVSSL  
AELPHGSVVGTSSLR RQCQLRQRPDLRGNVGTRL SKLD AII LAVAGLRKL PAVGQGA VGIECR LDDLHARETTVRVEAERAMNTRLEGGCQVP  
IGSYALWLRAAHSMGVELAEEL  
>GP7\_WP\_158651152.1\_Aeromonas\_veronii  
KIATRKSPLALWQANFVKDRLELVPMSTQGDKILDTPLAGKGLFVKELE TAMLEGRADIAVHSMKDV PVDFPEF PAGLGLHTICEREDPRDAFVSAI  
AELPQGA VVGTSSLR RQCQLRAARPDLRGNVNTRLAKLD AII LAAAGLRKL PANGQGA VGIECR LDDLHAE TRARV LTERAMNRLQGGCQVP  
IGAYAIWLRGGEALGEQLAQL  
>GP9\_ACB16089.1\_Escherichia\_coli  
RIATRQSPALWQAHYVKDKLELVPMVTRGDVILDTPLAGKGLFVKELE VALLENRADI AVHSMKDV PVDFPEF PQGLGLVTICEREDPRDAFVSSL  
DALPAGSIVGTSSLR RQCQLAERRPDLRGNVGTRL SKLD AII LAVAGLRKL PAVGQGA VGIECR LDDLNHHTETALRVTAERAMNTRLEGGCQVP  
IGSYAIWLRAAEQMGISIAEEL  
>BP1\_SQF93518.1\_Paucimonas\_lemoinei  
RIATRKSALALWQA EYVKGR LTLVPMVSRGDKLLDSPLSGKGLFVKELE TALLEDRADI AVHSMKDV PMDFPQGLGLFCICEREDPRDAFVSSL  
EALPAGSVVGTSSLR RQAQLLAR PDLRGNVNTRLAKLD AII LAAAGLIRLPAGGQGA VGIECRSD LHHDDTATRVTAERSLNKHLNGGCQVP  
IACYAIWLRGQA LGVQVAESL  
>BP2\_MBC7672458.1\_Polaromonas\_sp  
RIGTRTSELALRQARMVQA ALELVTYKTVGDKRLDESLSAKGLFTKELE TGLLKRKIDVAVHSLKDLPTESPHGLVVAAVLEREDPRDALVVSL  
DGLPRGSRVGTSSLR RRAQLLATRPDLRGNVPTRLKKVHAAI LAAAGLHRLPAAGQGA IAVQTRLDDMNDAPTMRAVRAERAFLAALEGGCQVP  
IGALAAMLHGPESLGIRLANQL  
>BP3\_WP\_136771940.1\_Chitiniphilus\_eburneus  
VIATRESPLALWQA EHVRAWLELLGMTTQGDRI LDVTLNGKGLFVKELE QALADGRADIAVHSMKDV PMVMPDGFALTAIGEREDPRDALVSTL  
EQLPAGAVVGTSSLR REAQLRARFPHLRGNVGTRLAKLD AILLASAGLRKL PAPGQGA LGLEIRADR FNHPATAAAVTAERALSRRMGGSQIP  
LAAYALRLRGAEGLGLKVAELL  
>BP4\_WP\_007881387.1\_Herbaspirillum\_sp

VIASRESRLAMWQAEHVDRDLIILGMTTRGDQILDRTLSGKGLFVKELEVAMAEGRADFAVHSLKDVPMELPQGFVLGGILEREDPRDAFVSGL  
DDLPHGAVVGTSSLRRQALIAARYPHLRGNLDTRLAKLAAIILAVAGLKRLPAPGQGAMAIEILADRINHLPTDRAVTAERTLSRTFGGSCQIP  
LAAFAMHMLRAPEALGRQVADLL  
>BP5\_WP\_038490856.1\_Collimonas\_arenae  
VIASRESRLAMWQAEHVRRLEILGMTTRGDQILDRTLSGKGLFVKELEVAMVEGRADLAVHSLKDMPMDLPSGFALAAVLEREDPRDAFVSSL  
AELPAGAVVGTSSLRRQALIAARFLLRGNLDTRLAKLAAIILAAAGLKRLPAPGQGAMAIEICDDRNLHLPTAQVTAERTLSRAFGGSCQIP  
LAAFAMRLRAPQALGGKIAQDL  
>BP6\_KAB2868486.1\_Burkholderiaceae\_bacterium  
RIATRQSALALWQAEHVRAARLEILVPMTRGDQILDRLPLAGKGLFLKELEVALQQGRADIAVHSLKDVPMTLEPGFAIAAVLERADAADAFVSEL  
AQLPRRARVGTSSLRRQALRALRPDLRGNVNTRLARLDAIVLACAGLERLCVAGQGAIAIECRTDDLDATTTRCTDAERAMSLALHGSCNVP  
IAAYALSLWGAQALGQVAAQLL  
>BP7\_WP\_082814661.1\_Collimonas\_fungivorans  
VIASRESPLAMWQAEHVRRLEILGMTTRGDQILDRTLSGKGLFIKELEVAMEEGRADLAVHSLKDMPMELPPGFVLSAVLEREDPRDAFVSSL  
EQLPAGAVVGTSSLRRQALIAARFLLRGNLTRLAKLAAIILAAAGLKRLPAPGQGAMAIEIRADRLNHLPTLAVTAERTLSRAFGGSCQVP  
LAAFAMRLRAPEVLGIEIAAAL  
>BP8\_WP\_115432742.1\_Crenobacter\_cavernae  
VIASRESRLAMWQAEHVKARLSILGMTTQGDQILDKTLSGKGLFVKELEVALAEGRADLAVHSIKDVPMLPEGFALAAICEREDPRDAFVSSL  
AELPDGAVVGTSSLRRESQRLARYPHLRGNVQTRLAKLDAIILAAAGLKRLPAPGQAGLIEIRADRLDHADTRDCVLAERALSRELGGSCQVP  
LGAYAVTLGGADALGRVAKKL  
>BP9\_SAH99349.1\_Bordetella\_trematum  
VIATRASRLALWQAEHVDRDLTLTLTRGDQILDRTLSGKGLFVKELEHALLDGRADLAVHSLKDVPVDMHAPFALSTILERADCRDAFVSSL  
DELPAGAVVGTSSLRREAQIRARPELRGNLDTRLGKLDAVVLAAGLQRLPAGQAGLIEIRDDRLLCAHTTACVSAERAVSRTLGGSCQVP  
LAAFALQIDAAERLGEIAAQEL  
>BP11\_WP\_173143141.1\_Achromobacter\_pestifer  
VIATRASRLALWQAEHVDRDLTLTLTRGDQILDRTLSGKGLFVKELENALLDGRADLAVHSLKDVPVDLQAPFELCAVLDRADPRDAFVSSL  
ADLPAGAVVGTSSLRRESQIRARYPELRGNLDTRLGKLDAIVLAAAGLERLPAAGQAGLIEIRDDRLLVSADTTSCVVAERAVSRKLGGSCQVP  
LAAAYALSLRAAQALGIEAAQAL  
>EP2\_WP\_122873789.1\_Campylobacter\_showae  
KIATRKSVLAMWQSEHIRDKIELTGMKTGKGDVILDTPLAGKGLFTKELEDSMLSGETHIAVHSLKDVPVVPDGLVLAIAICSRDVRDAML SKF  
EDLPQGARVGTSSLRRKMQLLAMRPDLRGNVQTRLRKLDAIILAMAGVNRLPAMGQAGLGEAR-  
EDLKDEKAVIETTVERDFVAMLEGGCQVPIGVNAIEIRAWKSVGAELGRIF  
>EP3\_WP\_084041450.1\_Campylobacter\_conciscus  
KIATRKSLALWQSEHIKARIELIGMKTGKGDVILDTPLAGKGLFTKELEDSMLKGETDIAVHSLKDVPVVPFPEGLKLAIAICSRDTRDAMISKF  
SDLPHGAKVGTSSLRRKMQLLIMRPDLRGNVQTRLRKLDAIILAMAGINRLPAMGQAGLGEAR-  
DELNDENAVIETTIERDFVSVLEGGCQVPIGISAISIDAFQSVGKELAHKF  
>EP4\_WP\_169780061.1\_Campylobacter\_curvus  
KIATRKSVLALWQSEHIKARLELVGMKTGKGDVILDTPLAGKGLFTKELEDSMLSGQTHIAVHSLKDVPVPAFPDGLVLAIAICSRDVRDAMISKF  
DDLPHGAKVGTSSLRRKMQLLRMRPDLRGNVQTRLRKLDAIILAMAGINRLPAMGQAGLGEAR-  
VDDLNDERSVIETTRVERDFVTLLLEGGCQVPIGINAIEINAFESVGKELAREF  
>EP5\_WP\_103645015.1\_Campylobacter\_conciscus  
KIATRKSLALWQSEHIKARIVLEGMKTGKGDVILDTPLAGKGLFTKELEDSMLKGETDIAVHSLKDVPVVPFPGKLKLAIAICSRDTRDAMISKF  
SNLPHGAKVGTSSLRRKMQLLIMRPDLRGNVQTRLRKLDAIILAMAGINRLPAMGQAGLGEAR-  
DELNDENAVIETTIERDFVSVLEGGCQVPIGISAISIDAFQSVGKELAHKF  
>DP1\_WP\_155874870.1\_Desulfuromonas\_sp  
RIGTRASQLALWQANVWKAELTLTKIKTQGDKILDVPLAGKGLFVKEIEEAMLRGEIDIAVHSMKDVPTIFPEGLALRCITKREDPRDICVISF  
RDLPHGARIGTSSLRRKQALLHLRPDLRGNVETRIRKLDAVILAAAGMHRLPAITGQAGLGLIESRLDDFNHPETAAAVIAERALLRLEGGCQVP  
IAAYGLTFTGAEKIGISVADDL  
>DP3\_WP\_092057636.1\_Desulfuromonas\_acetexigens  
RIGTRASQLALWQANVWVSELTLTKIKTQGDKILDVPLAGKGLFVKEIEEAMLRGEIDIAVHSMKDVPTFFPEGLALRCITEREDPRDIVVLSF  
RDLPHGARIGTSSLRRKQALLHLRPDLRGNVETRIRKLDAVVLAAGMHRLPAITGQAGLGLIESRIADFNHPETAAAVKGERAVLRLEGGCQVP  
IGAYGLTLTGSEKVGISLADDL  
>DP4\_WP\_067618923.1\_Dissulfuribacter\_thermophilus  
RLGTRKSKLALQSNVWVQEIQLVKVTTKGDKILDVPLAGKGLFVKEIEEALLDGRIDFAVHSLKDVPTELPGGLEVSVPFEREDPRDALIAGL  
MELPPGAKVGTSSLRRMAQLRAVRPDLRGNLDTRLNKLDAIILAAAGLKRLPAITGQAGLGLIEFRSEDL SHEETTRVRAERAFLRLEGGCQVP  
IGAYALTLEGPEFIGDELGKEM  
>DP5\_QW86780.1\_Geobacter\_sp  
KIGTRSSPLALWQAEVWSARITLVKIKTGTGMILNVPLAGKGLFVKEIEEAMLRGEVDIAVHSMKDVPTVFPPGIGLTCISKREDPRDAIVSSF  
AELPHGARVGTSSALRRQAQLLAHRPDLRGNVQTRLAKLDAVILAAAGLKRLPAITGQAGLGLIECRLLDLDLNETQRAVGAERAFLRCEGGCQVP  
IAAFALRLTGFLSLGTELAADRL  
>DP6\_WP\_012646388.1\_Geobacter\_daltonii  
RIGTRASQLALWQANVWVKSLSLVKIKTIGDKILDVPLAGKGLFVKEIEEAMLRGDDIAVHSMKDVPTFPEGLGLHCITEREDPRDAVISKF  
ADLPQGAKIGTSALRRQAQLLKVRPDLRGNVETRIRKLDAVILAAAGLKRLPAITGQAGLGLIECRLLDLDLNETQRAVGAERAFLRCEGGCQVP  
IAAFGLKLVGCEKLGKIAELQEL  
>DP7\_WP\_040199015.1\_Geoalkalibacter\_subterraneus  
RIGTRSSQLALWQANVWKNCLTLTKIKTQGDKILDVPLAGKGLFVKEIEEAMLRGEVDIAVHSMKDVPTIFPEGLDLRCITEREDPRDIVVLSW  
RDIPQGGRIGTSSLRRKQALLHLRPDLRGNVETRIRKLDAVVLAAGMKRLPAITGQAGLGLIECRLLDLDLNETQRAVGAERAFLRCEGGCQVP  
IAAYGVNLTGAAQLGISLAEDL  
>DP8\_WP\_119333830.1\_Geobacter\_sulfurreducens  
RIGTRASQLALWQANVWVKSLELVKIKTIGDKILDVPLAGKGLFVKEIEEAMLRGEIDIAVHSMKDVPTFPEGLGLVCITEREDPRDAFISTF  
ADLPQGAKIGTSALRRQAQLLKVRPDLRGNVETRIRKLDAVILAAAGLKRLPAITGQAGLGLIECRLLDLDLNETQRAVGAERAFLRCEGGCQVP  
IAAHGLTLTGCEKLGIALAEKL  
>DP9\_WP\_022660166.1\_Desulfovibrio\_desulfuricans  
VIATRGSQALALWQAEHVKSRLDLVLIKTKGDIQDVPLAGKGLFVKEIEEALLDNRADLAVHSIKDVPMELPDGLILGCIKREAPTDCMLSDL  
AALPQGACVGTSSLRRQAQLLALRPDLRGNVDTRLRKLDAIILASAGMNRLPAVGQAGLIECREDDIEDTPTRVCVEAERGFLAGLEGGCQVP  
IAGHAFVLEGARQIGLELAEKL  
>DP10\_WP\_077072293.1\_Mailhella\_massiliensis

IIATRGSKLALWQAEHVRRERLELLVLKTKGDIILDVPLAGKGLFVKEIEDALLTGAADIAVHSMKDVPMVLPGLIILGAVPEREVCNDLFLSSL  
ADLPFGAVLGTSSLRRQAVLAMRPDLRGNVETRLRKMDAIIILARAGVKRLPAVGQGALGVEMREDRMEDEPTRLCVMAERSFLRRLDGGCQVP  
IAAHALSLQAAERMGVALAEDL  
>DP11\_WP\_066801385.1\_Pseudodesulfovibrio\_indicus  
TIATRGSAALWQANHIKDRLDLLKIKTKGDKILDVPLAGKGLFVKEIEEALLDGRAQLAVHSMKDVPTLPEGLEVGIIPEREHTDTLCSSL  
KDLPRGAVVGTSSLRRQSQIILARPDRLRGNVGRVQKLDIAIILATAGLKRLPAVAQGALGIEYRIDDLDPATKHQVLAERGFLTGLDGGCQVP  
IAAWSVRLTGAWDVGMLVLAGKV  
>F4\_WP\_007506293.1\_Caldalkalibacillus\_thermarum  
VLGSRRSKLALTQTRWVIRQLEIKEIVTKGDKIVDRMLSGKGLFVKEIEQALLEGIDFAVHSMKDMPAELPPGLELACVPKREDPRDCLISTL  
DSLPGDAVIGTSSLRRAAQILHARPDPVGRNVDTRLRKLDIAIILASGLKRIPAVGQGALGIECRASDIHHEPSGLAVMAERAFLAEMGGSCHVP  
VACYALVLTGPVQLGRQAAQRL  
>F5\_WP\_094236160.1\_Tumebacillus\_algifaecis  
VVGTRKSPALALTQTEMVMAKLGMEKIVTKGDKILDVTLSGKGLFIKEIEQAMYEEKIDFAVHSLKDMPTMPEGLMLAAITEREDPRDVITTF  
ADLPFAGRVGTSSLRRAAQLLNARPDRLRGNINTRIAKLDAIVLAAAGLERMPAVGQGALAIQCRSEDLDVNTRTRVTARTVTLGRNLGGCQIP  
IGAFALKLTGPMAGVGHVCAERL  
>F7\_WP\_033099238.1\_Thermoactinomyces\_daqus  
IVGTRKSQLAMTQTSWVDRLEMEKIVTKGDKILNVTLSGKGLFVKEIEQALLDGRIDFAVHSMKDLPGEMPEGLVIGAIIPRENPRDVLLSML  
AELPPGSSVGTSSLRRQAILASRPDLRGNLDTRIRKMDAIVLAAAGLYRMPAVGQGALAIQCREDDINHEQTARAVRAERAFLVAFEGSCHMP  
LAAYAVHLTGPAAGVQKAKEM  
>F10\_WP\_048355980.1\_Bacillus\_glycinifermentans  
IVGSRRSKLAMTQTKWVKKLEIKEIVTKGDKILDVTLSGKGLFVKEIEQAMLSGEIDMAVHSMKDMPSALPESLVIGCVPKREDVDRDALISTL  
AELPQGAUVGTSSLRRSAQLLQIRPDRLRGNIDTRLKKLDIAIILAAAGLSRMPAVGQGALAIQCRADDLNDCYTEQTVTAERAFLHAMEGGCQIP  
IAGFAIELTGPAAGVGHVCAERL  
>A5\_SGC95152.1\_Mycobacterium\_tuberculosis  
RIATRQSPALWQAEFVQLELVPMVTGDIILDTPLAGKGLFVKELELALLENRADIHAVHSMKDVVPDFPDGLGLVTICEREDPRDAFVSSV  
DALPPGSSVGTSSLRRQCQLRERRPDRLRGNVGRTRGLKLDIAIILAVAGLKRLPAVGQGAVGIECRDLNLHAQTDICVRAERAMNTRLEGGCQVP  
IGSYAIWLRAAAAGVSLAEEL  
>A7\_WP\_066890085.1\_Streptomyces\_thermoautotrophicus  
KLGTRKSSLAQAQARAVAEIELVGITTYGDTTK-  
AALAGTGVFVNALRDALLEGRIDLAVHSLKDLPTTQPDGLVIAAVPPREDPRDALCAKLTLSAGARVGTGSPRRAAQLRALGYGLRGNVDTRL  
RVYDAVVLARAGLARLPAPGQALAVECRAGHLDDPDTRAADVTAERALLAALEAGCSAPVGAFLYLRGADQLGRRLAAEM  
>A8\_WP\_073262358.1\_Cryptosporangium\_aurantiacum  
RLGTRASKLALAQSGDVAAALELVHISTDGDRTTPTLTGTGVFVSALRDALLADEIDFAVHSYKDLPTAAAEGLTIAAVPVPRADTRDALIATL  
EKLPAAGARIGTGAPRIAQLLAARPDPVGRNVDTRLGKVDVAVVLAVAGLTRLPAQAQALAIQCRADDLEDGARAEEVVAERTLLATLEAGCSAP  
VAAWALTLRAAETVGRQLAADL  
>A9\_WP\_110240992.1\_Nocardioides\_gilvus  
RLGTRASALATTQSGMVADEIELVHITTEGDVNR-  
GPLAGTGVFVSALRDALLDGRVDLAVHSLKDIPTTPAEGITLAAVPQREDPRDVLVATLGELPAGSKVGTGSPRRAAQLAALGLGLRGNVGTRI  
GKVDGILLAHAGLNRLPAPGQALAIQCRTEDLHAPRAAVVCERQVLATLEAGCSAPLGAALWIRAAAREIGQRLGSEM  
>BA2\_WP\_159761666.1\_Chryseobacterium\_sp  
RIATRQSPALWQAHYVVKDRLELVPMVTRGDVILDTPLAGKGLFVKELELALLEDRADIHAVHSMKDVVPVEFPGLGLTTICERDDPRDAFVSSI  
DALPAGCVVGTSSLRRQCQLAADRPDLRGNVGRTRGLKLDIAIILAVAGLKRLPAVGQGAVGIECRDLNLHADTAVRVCAERAMNTRLEGGCQVP  
IGSYAIWLRAAKELGISLAEEL  
>BA3\_WP\_159612286.1\_Tenacibaculum\_sp  
RIATRKSALALWQAEYVAKLELVPMSTQGDKILDTPLAGKGLFIKELEIAMLEGRADIHAVHSMKDVVPVEFPDGFGLHAICERENPFDAFVSSL  
DALPQGAUVGTSSLRRQCQIRKYRPDLRGNVNTRLAKLDIAIILASAGLIRLPAVGQGAVGIECRNDDLNDTNTNTRVTAERAMNERLEGGCQVP  
IGSFALTLTGAKDIGIEVAEAL  
>BA5\_OOK62944.1\_Pedobacter\_himalayensis  
RIATRQSPALWQAHYVVKQRLLELVPMVTRGDVILDTPLAGKGLFVKELELALLENRADIHAVHSMKDVVPVEFPEGLGLVTICEREDPRDAFVSSL  
DALPAGSVVGTSSLRRQCQLAERRPDRLRGNVGRTRGLKLDIAIILAVAGLKRLPAVGQGAVGIECRMVDNLNDDTAVRVKAERAMNTRLEGGCQVP  
IGSYALWLRAAELGVSLAEEL  
>BA7\_WP\_171572752.1\_Flavobacterium\_sp  
RIGSRKSQALVQTYWVKDCLEVHTMSTQGDKILDVALLADKGLFTKELEVGMITGDIDFAVHSLKDLPTNLDPGLMLGCVTERENPADALVVQL  
DTLPEGAVIGTSSLRLRLAQLRHHPHLRGNLNTRLAKLDGLIILAVAGLKRLHAVGQGALGIECRVGDLEHLPTAYRCYASERSFLRELEGGCQVP  
IGVNTLTLTGADQIGIQIAQQL  
>BA8\_WP\_106151552.1\_Marinilabilia\_salmonicolor  
NIGTRSSQLAMWQAEAVKKALEIVPINTKGDAVLDAVLSKGLFTKEIENALLDGRVDVAVHSLKDLPTLLPEGLTLGGVLPGEVRDVLVSGL  
NELTSADKIGTSSLRRQAQLLHFNPELGRNVNTRLRKMDAMIMAGAGFIRLPAVSQGAAMEIRDNDITDPKSLTTSARVFLKTIIEGGCQVP  
VACYSITLTGANANARELGQKL  
>BA10\_WP\_011404301.1\_Salinibacter\_ruber  
VLGTRGSELALRQANVRSRLELETITTRGDEATDTPISDEAVFTKELDRALLQGGVDLAVHSLKDIPTVPSPGLALAAIGEREDPRDAFVAHL  
HDLPEGATVATASLRRTAQLLTWRSDLRGNVDTRLEKLTGMVLAVAGLVRLPAVGQGALGIACREDQLHHAPSghaanaeraflkKVGCGCQVP  
LGAWALVLDAGAAVGRKLAADL  
>BA11\_WP\_018360336.1\_Porphyrromonas\_macacae  
IVGTRGSKLALAQTELLCQALETKI IKTKGDRFLELSLSDKGLFTREIEAQLLDGAIDMAVHSLKDLPLVACVPMTMIGAYLERAKTEDVLIGTL  
EELPEGAVVGTSSKRRFQLSEKYPHFRGNVETRIAKMDAILMARAGMERLPAPGQAAIAIHIRNNDIDHKTTRYEVEFERELQLSGGGCAMP  
LGCVCNEVEVREATMKKLVMEEL  
>BA12\_HEK45059.1\_Rhodothermus\_marinus  
RLGTRGSLARQALSLAFLQVVI IQTTGDQIQEVPLASKGLFTKELDQALLEGRIADLAVHSLKDLPTLPGKGLVLAIPERASPWDVFVATL  
ADLPTGAVLATSSLRRQAQLRAWRADVRGNVDTRLRLHLGLILAEAGLMRLPAVGQGALGVVCNADNMHPPTAAAVRAERAFLRALEGGCQVP  
VAALGLVLRGPEALGEALAEAL
